## 1 Mapping QTL for spike fertility related traits in two double haploid wheat (*Triticum aestivum* L.) populations

2  
3 Nicole Pretini<sup>1, #</sup>, Leonardo S. Vanzetti<sup>2, 3</sup>, Ignacio I. Terrile<sup>4</sup>, Guillermo Donaire<sup>2</sup> and Fernanda G. González<sup>1, 3, 4</sup>

4  
5 <sup>1</sup>Centro de Investigaciones y Transferencia del Noroeste de la Provincia de Buenos Aires (CITNOBA, CONICET-  
6 UNNOBA-UNSADA). Monteagudo 2772 CP 2700, Pergamino, Buenos Aires, Argentina.

7 <sup>2</sup> Instituto Nacional de Tecnología Agropecuaria (INTA). EEA INTA Marcos Juárez. Ruta 12 s/n CP 2850, Marcos  
8 Juárez, Córdoba, Argentina.

9 <sup>3</sup> Consejo Nacional de Investigaciones Científicas y Técnicas (CONICET). Godoy Cruz 2290 CP C1425FQB, Buenos Aires,  
10 Argentina.

11 <sup>4</sup> Instituto Nacional de Tecnología Agropecuaria (INTA). EEA INTA Pergamino. Ruta 32, km 4,5 CP 2700, Pergamino,  
12 Buenos Aires, Argentina.

13 # Corresponding author E-mail: [pretini.nicole@inta.gob.ar](mailto:pretini.nicole@inta.gob.ar)

### 14 15 Abstract (150-250)

16 In breeding programs, the selection of cultivars with the highest yield potential consisted in the selection of the yield *per se*,  
17 which resulted in cultivars with a higher grain number per spike (GN) and occasionally higher grain weight (GW) (main  
18 numerical components of the yield). This task could be facilitated with the use of molecular markers such as single  
19 nucleotide polymorphism (SNP). In this study, quantitative trait loci (QTL) for GW, GN and spike fertility traits related to  
20 GN determination were mapped using two double haploid (DH) populations (Baguette Premium 11 x BioINTA 2002 and  
21 Baguette 19 x BioINTA 2002, BP11xB2002 and B19xB2002). Both populations were genotyped with the iSelect 90K SNP  
22 array and evaluated in four (BP11xB19) or five (B19xB2002) environments. We identify a total of 305 QTL for 14 traits,  
23 however 28 QTL for 12 traits were considered significant with an  $R^2 > 10\%$  and stable for being present at least in three  
24 environments. There were detected eight hotspot regions on chromosomes 1A, 2B, 3A, 5A, 5B, 7A and 7B were at least two  
25 major QTL sheared confident intervals. QTL on two of these regions have previously been described, but the other six  
26 regions were never observed, suggesting that these regions would be novel. The R5A1 (*QSL.perg-5A*, *QCN.perg-*  
27 *5A*, *QGN.perg-5A*) and R5A.2 (*QFFTS.perg-5A*, *QGW.perg-5A*) regions together with the *QGW.perg-6B* resulted in a final  
28 higher yield suggesting them to have high relevance as candidates to be used in MAS to improve yield.

29  
30 **Key words (4-6):** grain number, grain weight, spike length, spikelets per spike, fertile florets, chaff

### 31 32 Author contribution statement

### 33 34 Acknowledgments

35 The present work was funded by the Agencia Nacional de Promoción Científica y Tecnológica (PICT 2012-1198, PICT  
36 2014-1283), the Instituto Nacional de Tecnología Agropecuaria (INTA, PNCYO 1127042, 2019-PE-E6-I126-001, 2019-PE-  
37 E6-I114-001 Argentina, the Monsanto Beachell-Bourlag Scholarship, the Universidad Nacional del Noroeste de la Provincia

38 de Buenos Aires, (UNNOBA, SIB 2015, SIB 2017, SIB 2019) Argentina and the EU FP7 Funding (ADAPATWHEAT  
39 289842). NP is a research fellow of the Consejo Nacional de Investigaciones Científicas y Técnicas (CONICET) at the  
40 Centro de Investigación y Transferencia del Noroeste de Buenos Aires (CITNOBA). We also thank Luis Blanco, Yanel Perez  
41 and Octavio Ghio Trebino for the field technical assistance.

42

43 **Key message (30 words):** 28 stable and major QTL for 12 traits associated to spike fertility, GN and GW were detected.  
44 Two regions on 5A Ch., and *QGW.perg*-6B showed direct pleiotropic effects on yield.

45

#### 46 **Abbreviations**

47 B19 = Baguette 19

48 B2002 = BioINTA 2002

49 BP11 = Baguette Premium 11

50 CH = chaff (no-grain spike dry weight at harvest per spike, mg spike<sup>-1</sup>)

51 CN = compactness of the spike (mm node<sup>-1</sup>)

52 DH = double haploid

53 E1 to E5 = testing environments, see Table 2

54 FF = fertile florets per spike (n° spike<sup>-1</sup>)

55 FFFS = fertile florets per fertile spikelet (n° spikelet<sup>-1</sup>)

56 FFTS = fertile florets per total spikelet (n° spikelet<sup>-1</sup>)

57 FS = fertile spikelets per spike (n° spike<sup>-1</sup>)

58 GLPA = glume+lemma+palea+awn (mg spike<sup>-1</sup>)

59 GN = grain number per spike (n° spike<sup>-1</sup>)

60 GST = Grain set (n° grains floret<sup>-1</sup>)

61 GW = grain weight (g)

62 R = rachis (mg spike<sup>-1</sup>)

63 SDW = spike dry weight at anthesis (mg spike<sup>-1</sup>)

64 SL = spike length (mm)

65 TS = total spikelets per spike (n° spike<sup>-1</sup>)

66

#### 67 *1. Introduction*

68 Wheat (*Triticum aestivum* L.) is one of the most cultivated and consuming worldwide cereals. Its production has to increase  
69 to supply the growing world population demand (FAO 2017; Borlaug 2007; Chand et al. 2009). Improving the cultivar's  
70 yield potential (i.e., the yield of a cultivar adapted to the environment, which is growing without water or nutrient deficits and  
71 with no biotic stress, Evans et al. 1993) by breeding is a sustainable alternative to guarantee increases in world production  
72 (Fischer and Edmeades 2010; Fischer et al. 2014). Wheat breeding of yield potential has been based on empirical selection of  
73 yield *per se* due to the complexity of the character and the lack of knowledge and useful tools with real applicability in  
74 breeding programs (Snape and Moore 2007). This selection generally resulted in more grains per spike (GN), and hence,

75 increased grains per unit area (no consistent trend in spikes per unit area were reported) (Waddington et al. 1986; Perry and  
 76 D'Antouno 1989; Siddique et al. 1989; Slafer and Andrade 1989, 1993; Acreche et al. 2008; Del Pozo et al. 2014; Lo Valvo  
 77 et al. 2018). The grain weight (GW) showed no change with breeding, except for some recent reports were yield potential  
 78 was positively associated with its increment (Sadras and Lawson 2011; Aisawi et al. 2015; Yao et al. 2019).  
 79 The selection process could be more efficient using molecular markers. The implementation of single nucleotide  
 80 polymorphism (SNP) markers in plan breeding had increased the pace and precision of plant genetic analysis, which in turn  
 81 facilitated the implementation of crop molecular improvement (Mammadov et al. 2012). SNP markers have been increasingly  
 82 used for QTL mapping studies because they are the most frequent variations in the genome, and they provide a high map  
 83 resolution (Bhatramakk et al. 2002; Jones et al. 2007; Mammadov et al. 2012;). Therefore, the identification, understanding  
 84 and incorporation of related yield QTL could be useful as selection tools for breeding programs.  
 85 The most common approaches looking for genetic bases to further improving yield potential are based on the numerical  
 86 component analyses, GN and GW (see references quoted in Table S1). The GN is understand as the result of the total  
 87 spikelets per spike (TS) and the grains per spikelet, being the former associated with the spike length (SL) and compactness  
 88 of the spike (CN). Several QTL had been reported for the GW and the GN itself and their numerical components during last  
 89 years. Many studies identified stables QTL for these traits widespread in the genome (see Table S1). However, considering  
 90 the IWGSC Ref. Seq. v1.0 wheat genome assembly (Appels et al. 2018) we identified some QTL reported for the same trait  
 91 that are located at the same position (Table 1). For example, a QTL for GW was detected in 6 studies in the chromosome 7A  
 92 (Li et al. 2015; Wang et al. 2017; Daba et al. 2018; Li et al. 2018; Ma et al. 2018; Guan et al. 2018) (Table 1). Another two  
 93 important QTL for SL were detected in chromosomes 2D and 5A (Börner et al. 2002; Wu et al. 2012; Xu et al. 2014; Zhai et al.  
 94 2016; Chen et al. 2017; Deng et al. 2017; Li et al. 2018; Guo et al. 2018; Fan et al. 2019) (Table 1). Additionally, two  
 95 QTL for TS were detected on chromosomes 5A and 7A in several studies (Jantauriyarat et al. 2004; Ding et al. 2011; Wang  
 96 et al. 2011; Cui et al. 2012; Wu et al. 2012; Xu et al. 2014; Zhai et al. 2016; Ma et al. 2018; Fan et al. 2019) (Table 1).

97  
 98 Table 1. Significant QTL detected in different studies that sheared interval positions according to the Chinese Spring RefSeq  
 99 v1.0 sequence.

| Trait <sup>a</sup> | Chr. <sup>b</sup> | Position (Mb) <sup>c</sup>                              | Bibliography                                                            |
|--------------------|-------------------|---------------------------------------------------------|-------------------------------------------------------------------------|
| GN                 | 1B                | 16.2-55.4                                               | Zhai et al. 2017; Li et al. 2018                                        |
|                    | 3A                | 705.3-749.1                                             | Gao et al. 2015; Guan et al. 2018                                       |
|                    | 4A                | 603.3-685.0                                             | Börner et al. 2002; Gao et al. 2015; Chen et al. 2017; Guan et al. 2018 |
|                    | 4B                | 16.8-98.7                                               | Li et al. 2015; Li et al. 2018                                          |
|                    | 7A.1              | 167.3-167.3                                             | Zhai et al. 2017; Li et al.2018                                         |
|                    | 7A.2              | 670.2-719.6                                             | Li et al. 2015; Li et al. 2018; Guan et al. 2018; Guo et al. 2017       |
|                    | 7B                | 716.6-740.0                                             | Li et al. 2018; Liu et al. 2018                                         |
| GW                 | 1B                | 598.4-679.4                                             | Guan et al. 2018; Sukumaran et al. 2018                                 |
|                    | 2A                | 639.1-751.0                                             | Guan et al. 2018; Ma et al. 2018; Sukumaran et al. 2018                 |
|                    | 2D                | 296.4-382.2                                             | Cuthbert et al. 2008; Wu et al. 2012; Yu et al. 2018                    |
|                    | 3A.1              | 29.6-58.5                                               | Li et al. 2018; Sukumaran et al. 2018                                   |
|                    | 3A.2              | 732.4-761.5                                             | Cuthbert et al. 2008; Zhai et al. 2017                                  |
|                    | 4A                | 607.9-685.0                                             | Ding et al. 2011; Tang et al. 2011; Gao et al. 2015; Guan et al. 2018   |
|                    | 4B                | 236.7                                                   | Chen et al. 2017; Zhou et al. 2017                                      |
|                    | 4D                | 12.8-62.5                                               | Wang et al. 2011; Chen et al. 2017                                      |
|                    | 5A.1              | 462.9-495.9                                             | Cuthbert et al. 2008; Li et al. 2018; Sukumaran et al. 2018             |
| 5A.2               | 524.2-619.0       | Wang et al. 2017; Li et al. 2018; Sukumaran et al. 2018 |                                                                         |

|           |      |             |                                                                                                                                 |
|-----------|------|-------------|---------------------------------------------------------------------------------------------------------------------------------|
|           | 5A.3 | 656.0-671.4 | Kato et al. 2000; Börner et al. 2002; Chen et al. 2017                                                                          |
|           | 5B   | 411.8-418.8 | Zhai et al. 2016; Deng et al. 2017                                                                                              |
|           | 6A   | 442.4-465.9 | Zhai et al. 2017; Li et al. 2018                                                                                                |
|           | 6B   | 20.8-67.9   | Tang et al. 2011; Li et al. 2018                                                                                                |
|           | 7A.1 | 85.7-116.0  | Cuthbert et al. 2008; Tang et al. 2011                                                                                          |
|           | 7A.2 | 664.3-719.6 | Li et al. 2015; Wang et al. 2017; Guan et al. 2018; Daba et al. 2018; Li et al. 2018; Ma et al. 2018                            |
|           | 7B   | 683.5-734.3 | Gao et al. 2015; Li et al. 2018; Ma et al. 2018                                                                                 |
| <b>TS</b> | 1A   | 398.6-399.5 | Chen et al. 2017; Zhou et al. 2017                                                                                              |
|           | 2D   | 19.6-38.3   | Ma et al. 2014; Ma et al. 2018                                                                                                  |
|           | 4A   | 535.4-630.9 | Jantauriyarat et al. 2004; Chen et al. 2017; Ma et al. 2018                                                                     |
|           | 5A   | 682.7-698.2 | Ding et al. 2011; Wang et al. 2011; Cui et al. 2012; Wu et al. 2012                                                             |
|           | 7A   | 626.1-680.0 | Jantauriyarat et al. 2004; Ding et al. 2011; Cui et al. 2012; Xu et al. 2014; Zhai et al. 2016; Ma et al. 2018; Fan et al. 2019 |
|           | 7B   | 622.3-718.9 | Ma et al. 2018; Fan et al. 2019                                                                                                 |
|           | 1B   | 302.0-406.3 | Börner et al. 2002; Jantauriyarat et al. 2004                                                                                   |
| <b>SL</b> | 2B   | 7.9-31.6    | Cuit et al. 2012; Zhai et al. 2016                                                                                              |
|           | 2D   | 17.6-99.4   | Wu et al. 2012; Xu et al. 2014; Zhai et al. 2016; Chen et al. 2017; Deng et al. 2017; Li et al. 2018                            |
|           | 3B   | 40.1-52.8   | Cui et al. 2012; Li et al. 2018                                                                                                 |
|           | 4A.1 | 499.4-575.0 | Guo et al. 2018; Li et al. 2018                                                                                                 |
|           | 4A.2 | 603.3-688.1 | Börner et al. 2002; Wang et al. 2011; Gao et al. 2015; Chen et al. 2017                                                         |
|           | 5A   | 470.0-541.3 | Börner et al. 2002; Zhai et al. 2016; Guo et al. 2018; Li et al. 2018; Fan et al. 2019                                          |
|           | 6B   | 667.8-705.4 | Deng et al. 2017; Li et al. 2018                                                                                                |
| <b>CN</b> | 2D   | 14.4-23     | Xu et al. 2014; Zhai et al. 2016                                                                                                |
|           | 5A   | 478.6-541.2 | Zhai et al. 2016; Fan et al. 2019                                                                                               |
| <b>FS</b> | 1A   | 243.4-497.5 | Zhou et al. 2017; Ma et al. 2018                                                                                                |
|           | 1B   | 16.2-222.6  | Zhai et al. 2016; Deng et al. 2017                                                                                              |
|           | 2B   | 9.0-182.4   | Deng et al. 2017; Ma et al. 2018                                                                                                |
|           | 7A   | 632.6-675.3 | Ma et al. 2018; Fan et al. 2019                                                                                                 |

100 <sup>a</sup> GN: Grain number per spike, GW: Grain weight, TS: Total spikelets per spike, SL: Spike length, CN: Compactness of the  
 101 spike, FS: Fertile spikelets per spike.

102 <sup>b</sup> Chromosome.

103 <sup>c</sup> QTL overlapped in a 50Mb region according to the Chinese Spring RefSeq v1.0 sequence were considered as the same.

104

105 From the crop physiology approach, the GN depends on the florets that reach the fertile stage at anthesis (fertile florets per  
 106 spike, FF) and on the proportion of them that set grains (grain set, GST, grains per fertile floret). Both depend on the  
 107 assimilate availability, the first one for the growing spike and developing florets during the 20 days before anthesis (Fischer  
 108 1975, 1985; Kirby 1988; González et al. 2011), and the second one during the 10 days after anthesis (Fischer 1975, 1985).  
 109 This would explain the high importance in GN and FF determination of: (i) the spike dry weight achieved at anthesis (SDW)  
 110 (Fischer and Stockman 1980; Siddique et al. 1989; Slafer and Andrade 1993; Fischer 1993); and (ii) the dry matter  
 111 partitioned within the spike between florets/grains and spike structure parts, that is, the fertile floret efficiency (FFE, fertile  
 112 florets per g of SDW) (Pretini et al. 2020a) and the fruiting efficiency (FE, grains per g of SDW, or FEm grains per g of chaff  
 113 at maturity) (Abbate et al. 1998; Bustos et al. 2013; García et al. 2014; Elía et al. 2016; Terrile et al. 2017; Lo Valvo et al.  
 114 2018; Pretini et al. 2020a). It was recently reported that in modern elite cultivars the SDW was less important to explain GN  
 115 variation than the fruiting efficiency (Abbate et al. 1998; Rivera-Amado et al. 2019; Bustos et al. 2013; Elía et al. 2016;  
 116 García et al. 2014; Lo Valvo et al. 2018; Terrile et al. 2017; Pretini et al. 2020a). The GST is considered to be high in relative

117 modern cultivars (i.e., >80% of fertile florets set grains) (Elía et al. 2016; González et al. 2003; Siddique et al. 1989), but  
118 recently it was shown it can be as low as 60% (Guo et al. 2017, Pretini et al. 2020a). Then, the amount of assimilates  
119 partitioned within the spike to grains or chaff (CH) or its structures (glume, lemma, palea, awns GLPA-, and rachis R-) and  
120 the GST and SDW are worthy of study. Only few studies looked for the genetic bases of these traits (Guo et al. 2017; Li et al.  
121 2018, Gerard et al. 2019; Basile et al. 2019; Pretini et al. 2020b, Table S1).

122 In a previous work (Pretini et al. 2020b), using one of the DH populations use in the present study, we identified and  
123 validated the novel *QFEm.perg.3A* for FEm in the chromosome 3A, and the first known QTL for FFE and FE,  
124 *QFFE.perg.5A*, located in the chromosome 5A. This last QTL was also detected when the FEm was measured, agreeing with  
125 Basile et al. (2019) who detected two regions within this QTL associated to FEm. Despite we studied the pleiotropic effect of  
126 both *QFFE.perg.5A* and *QFEm.perg.3A* on the associated traits of spike fertility mentioned previously, we did not look for  
127 new major and stable QTL for those traits themselves.

128 The aim of this study was to identify stable and major QTL for the spike fertility related traits (numerical and physiological  
129 components) and to discuss the possible pleiotropic effects among them and with the previously reported *QFEm.perg.3A* and  
130 *QFFE.perg.5A*. Two double haploid populations (Baguette Premium 11 x BioINTA 2002 and Baguette 19 x BioINTA2002)  
131 derived from the crosses of elite cultivars adapted to the central region of the wheat-producing area of Argentina were used.  
132 In the present study we report 305 QTL for different spike fertility related traits distributed throughout the wheat genome.  
133 Furthermore, we identify 8 genomic regions that group some of the significant and stable QTL and analyze their pleiotropic  
134 effect on other related traits. Finally, we found two regions (R5A1 and R5A.2) and a QTL (*QGW.perg-6B*) that resulted in a  
135 final higher yield.

136

## 137 2. Materials and methods

### 138 2.1. Plant materials

139 Two double haploid (DH) populations were developed from the crosses between Baguette Premium 11 x BioINTA 2002  
140 (BP11xB2002) and Baguette 19 x BioINTA 2002 (B19xB2002). BP11xB2002 consisted of 81 lines whereas B19xB2002  
141 consisted of 102 lines. The three parent lines are semi-dwarf hard hexaploid wheat cultivars and are adapted to central area of  
142 wheat production in Argentina (north of Buenos Aires and south of Córdoba provinces). BP11 and B19 were released by  
143 Nidera Semillas in 2004 and 2006, respectively, in Argentina, while B2002 (BPON/CCTP-F7-7792-122(87)) was developed  
144 by CIMMYT (International Maize and Wheat Improvement Center) and released in 2006 in Argentina by INTA. Cycle to  
145 anthesis in optimal sowing dates are similar for the three parents (González et al. 2011). The GW of B2002 was higher  
146 compared with the GW of BP11 and B19, whereas the GN of B19, followed by BP11, was higher than that of B2002 (Terrile  
147 et al. 2017). Generally, B2002 showed higher SDW and chaff than B19 and BP11 (Terrile et al. 2017; Pretini et al. 2020a, b).  
148 The three parents are spring cultivars and mostly insensitive to photoperiod (BP11 and B19: *Vrn-A1b/vrn-B1/vrn-D1* and  
149 *Ppd-D1a*; B2002: *vrn-A1/Vrn-B1/vrn-D1* and *Ppd-D1a*).

150 Both populations were genotyped with the iSelect 90K SNP assay (Wang et al. 2014) and evaluated in four (BP11xB19) or  
151 five (B19xB2002) environments (E1-E5, Table 2).

152

153 **Table 2.** Characteristics of the studied environments. Growing period, location and traits phenotyped for each DH  
154 population.

| Env <sup>a</sup> | Growing season | Location          | DH population <sup>b</sup> | Traits phenotyped <sup>c</sup>                                |
|------------------|----------------|-------------------|----------------------------|---------------------------------------------------------------|
| E1               | 2012           | EEA Pergamino     | B19xB2002<br>BP11xB2002    | SDW, FF, SL, TS, FS, FFTS, FFFS, CN, CH, R, GLPA              |
| E2               | 2013           | EEA Pergamino     | B19xB2002<br>BP11xB2002    | SDW, FF, SL, TS, FS, FFTS, FFFS, CN, CH, R, GLPA, GN, GW, GST |
| E3               | 2015           | EEA Pergamino     | B19xB2002<br>BP11xB2002    | SDW, FF, SL, TS, FS, FFTS, FFFS, CN, CH, R, GLPA, GN, GW, GST |
| E4               | 2015           | EEA Marcos Juárez | B19xB2002<br>BP11xB2002    | CH, R, GLPA, GN, GW                                           |
| E5               | 2016           | EEA Pergamino     | B19xB2002                  | SDW, FF, SL, TS, FS, FFTS, FFFS, CN, CH, R, GLPA, GN, GW, GST |

155 <sup>a</sup> Environment. All were field conditions except for E5. E1: Pergamino 2012, E2: Pergamino 2013, E3: Pergamino 2015, E4:  
156 Marcos Juárez, E5: Pergamino 2016 summer greenhouse.

157 <sup>b</sup> BP11xB2002: Baguette Premium 11 x BioINTA 2002, B19xB2002: Baguette 19 x BioINTA 2002

158 <sup>c</sup> SDW: spike dry weight at anthesis, FF: fertile florets per spike, SL: spike length, TS: total spikelets per spike, FS: fertile  
159 spikelets per spike, FFTS: fertile florets per total spikelet, FFFS: fertile florets per fertile spikelet, CN: compactness of the  
160 spike, CH: chaff (no-grain spike dry weight at harvest), R: raquis, GLPA: glume+lemma+palea+awns, GN: grain number per  
161 spike, GW: grain weight, GST: grain set.

162

## 163 2.2. Experiments and Phenotyping

164 The DH populations were grown in two experimental sites: EEA Pergamino (33° 51'S, 60° 56'W) and EEA Marcos Juárez  
165 (32° 43'S, 62° 06'W) Research Stations of INTA (Instituto Nacional de Tecnología Agropecuaria, Argentina) (Table 2). The  
166 field trails were carried out during three cropping seasons at Pergamino (E1: 2012, E2: 2013 and E3: 2015) and one cropping  
167 season at Marcos Juarez (E4: 2015) (Table 2). The greenhouse trail was carried out only for B19xB2002 during the summer  
168 season at Pergamino (E5: 2016) (Table 2). Field experiments were conducted in a randomized complete block design  
169 (RCBD) with two replicates. The E1 consisted of double-row plots (1 m long and 0.21 apart) with a sowing rate of 190 plants  
170 m<sup>-2</sup>. The E2 to E4 consisted of five-row plots (2 m long and 0.20 apart) with a sowing rate of 330 plants m<sup>-2</sup> in E2 and 280  
171 plants m<sup>-2</sup> in E3 and E4. The greenhouse experiment was conducted in a complete randomized design (CRD) with six  
172 replicates. Five plants per pot (5 l capacity) were transplanted after being vernalized in cool chamber (20 days at 5°C, 8 h  
173 light) during February.

174 Plants were sampled at the anthesis stage (Z6.1, Zadoks et al. 1974). In E1, five of the most representative spikes of each row  
175 were cut. In E2 and E3, a half meter of a central row was sampled, and the spikes were separated from the rest of the  
176 biomass, then the spikes were arranged by length and the three median spikes were selected. In E5 two main stem spikes of  
177 each pot were cut. In E4 no measurement at anthesis was made. The spike length (SL, mm) was measured from the base of  
178 the first spikelet to the terminal spikelet using an electronic caliper. The number of total spikelets per spike was counted (TS)  
179 and the spike compactness (CN, mm spikelet node<sup>-1</sup>) was estimated as the ratio between SL and TS. The number of fertile  
180 floret (FF) of each spike was count using a binocular microscope. The floret was considered fertile when yellow anthers were  
181 visible, or the floret score was >9.5 in Waddington scale (Waddington et al. 1983). The FF was count in a half side of the  
182 spike ("a") and in the terminal spikelet ("t"). The final number was estimated multiplying "a" by two and adding the "t"



183 value. The number of fertile spikelet (FS) was estimated as the number of spikelets with at least one fertile floret multiplied  
184 by 2 and adding the terminal spikelet in case it was fertile. The number of fertile florets per total spikelet per spike (FFTS)  
185 was estimated as the ratio FF/TS and the number of fertile florets per fertile spikelet per spike (FFFS) as the relation FF/FS.  
186 The spike dry weight at anthesis (SDW) was estimated after drying in an oven at 70°C during 48 h.  
187 When plants reached maturity (Z9, Zadoks et al. 1974) a second sample was performed. In E1 to E3 and E5, the spikes were  
188 selected following the same criteria as in anthesis. In E4, the spikes were selected following the same criteria as in E2 and E3.  
189 All the spikes were dried in an oven at 70°C during 48 h and weighted before threshing by hand. For E1 and E3 to E5, the  
190 rachis (R) and the rest of the no-grain parts (glume+lemma+palea+awn, GLPA) were separated when threshing and weighted.  
191 For those environments, the chaff (no-grain spike dry weight at harvest) was calculated as the sum of R+GLPA. In contrast,  
192 in E2 the chaff was estimated by subtracting the weight of all the grains from the dry weight of the spike before threshing,  
193 because no chaff dissection was performed. The grain number (GN) of each spike was counted in E2 to E5 using an  
194 automatic counter. The grains from E1 were discard because they were severely affected by fusarium head-blight. The grain  
195 weight (GW) was estimated as the ratio between the weight of all grains and the GN. Finally, the grain set (GST) was  
196 estimated as de ratio between GN/FF.

197

### 198 2.3. Data analyses

199 For each DH line, the mean value of each trait was calculated across the two replicates for E1 to E4 and the six replicates for  
200 E5. The Shapiro–Wilk test and the quantile-quantile (q-q) plot was performed to test for normal distribution. The analysis of  
201 variance (ANOVA) was performed using the Infostat/p software (Di Rienzo 2016). In addition, Best Linear Unbiased  
202 Estimator (BLUE) was estimated for each DH line including all tested environments as random variable using R v3.3.2.  
203 The narrow-sense heritability of the traits for BP11xB2002 and B19xB2002 was calculated as:

$$h^2 = \frac{\sigma_G^2}{\left(\sigma_G^2 + \frac{\sigma_{GE}^2}{E} + \frac{\sigma_{RES}^2}{ER}\right)}$$

204 Where  $\sigma_G^2$  is the genotypic (additive) variance,  $\sigma_{G \times E}^2$  is the G×E interaction variance, E is the number of environments, R is  
205 the number of replications, and  $\sigma_{RES}^2$  is the error variance (Hallauer and Miranda 1981).

206

### 207 2.4. Linkage map construction and QTL analysis

208 The DH populations and the three parents were genotyped with the iSelect 90K array containing 90,000 wheat SNP markers  
209 (Wang et al. 2014). Additionally, two functional markers for the vernalization genes *Vrn-A1* (Yan et al. 2004) and *Vrn-*  
210 *BI* (Fu et al. 2005) were added to the DH genetic map. Their positions were determined by BLAST against the reference  
211 genome IWGSC Ref. Seq. v1.0. (Appels et al. 2018). The SNPs markers with more than 20% of missing and/or heterozygous  
212 data were initially discarded for genetic map construction. Then, redundant markers with identical segregations were  
213 identified and grouped with the Python script, merger.py<sup>1</sup>. Finally, the R package “Rqtl” (Borman et al. 2003) was used for  
214 the genetic map development. The physical position of the SNPs was determined by BLAST against the IWGSC Ref. Seq.  
215 v1.0 wheat genome assembly (Appels et al. 2018).

---

<sup>1</sup> <https://github.com/juancrescente/lmap>

216 The mean value of the trait in each environment and the BLUE values, which were treated like an additional environment,  
 217 were used in the QTL mapping. The QTL analysis for the DH populations were scanned with QTL Cartographer 2.5 (Wang  
 218 2012) through composite interval mapping (CIM) with the standard model. For the standard model we used a control marker  
 219 number of 5, a window size of 10 cM and a forward and backward regression method with 500 permutations at  $\alpha = 0.05$ . A  
 220 LOD value of 2.5 was selected as a uniform threshold for all analyses. Detected QTL for a given trait with overlapping  
 221 support intervals (>50 Mb) were considered as equivalents. The QTL were considered “stable” if they were detected in a  
 222 minimum of three environments and were defined as “major stable” if they present a  $R^2 > 10\%$  in one environment at least.

223

### 224 3. Results

#### 225 3.1. Genetic Linkage Map Construction

226 The linkage map of BP11xB2002 consisted of 7,323 SNPs and two functional markers for the vernalization genes *Vrn-*  
 227 *AI* (Yan et al. 2004) and *Vrn-BI* (Fu et al. 2005) (Table S2, S3). All the SNPs represented a total of 723 loci across the 21  
 228 wheat chromosomes. The map covered 2605.3 cM in length with an average locus spacing of 4.7 cM (Table S2, S3). The  
 229 linkage map of B19xB2002 was previously described in Pretini et al. (2020b). Briefly, the B19xB2002 map consisted of  
 230 10,936 SNPs and the *Vrn-AI* and *Vrn-BI* markers. All the SNPs represented a total of 739 loci across the 21 wheat  
 231 chromosomes (Table S4, S5). The map covered 2,221.7 cM in length with an average locus spacing of 4.3 cM (Table S4, S5).  
 232 Although the genome length of each population was similar, distribution of the markers in the three genomes was not  
 233 uniform. In BP11xB2002, genomes A and B were similar with at least three times the number of polymorphic markers than  
 234 genome D, with 2,955, 3,513 and 857 markers, respectively (Table S3). In B19xB2002, the marker uneven distribution was  
 235 higher with 4,126, 5,448 and 1,364 markers in genomes A, B and D, respectively (Table S5).

236 The number of *loci* of the genomes A and B triple the number of *loci* of the genome D in both populations, with 311, 300  
 237 and 113 *loci* in BP11xB2002 and 324, 317 and 98 *loci* in B19xB2002, respectively (Table S3, S5).

238

#### 239 3.2. Phenotypic analysis

240 The means, ranges and heritability of the 13 studied traits across the five environments for the three parents and both DH  
 241 populations are detailed in Table S6. According to BLUE values, B19 and BP11 parents had higher FF, FFTS, FFFS and GN  
 242 than B2002, whereas B2002 had higher SDW, SL, TS, CH, R, GLPA and GW (Table 3). BP11 showed the highest FS value  
 243 whereas B19 showed the lowest FS value and B2002 showed an intermediate FS value (Table 3). All traits showed a normal  
 244 distribution across each environment and BLUE values, with a transgressive segregation from both parent lines in both  
 245 populations (Table 3, Table S6).

246

247 Table 3. Parental and population means, ranges and the Shapiro-Wilk test for all traits based on the adjusted mean (BLUE)  
 248 values of four (BP11xB2002) and five (B19xB2002) shared environments.

| Trait <sup>a</sup> | Parental Line |      |      | BP11xB2002 |       |       |                 |                | B19xB2002 |       |      |     |      |
|--------------------|---------------|------|------|------------|-------|-------|-----------------|----------------|-----------|-------|------|-----|------|
|                    | B2002         | BP11 | B19  | Min        | Max   | Mean  | SD <sup>b</sup> | W <sup>c</sup> | Min       | Max   | Mean | SD  | W    |
| SL                 | 98.6          | 93.7 | 87.2 | 86.6       | 122.7 | 101.6 | 7.5             | 0.97           | 79.4      | 105.5 | 94   | 6.4 | 0.96 |
| TS                 | 22.2          | 19.6 | 20   | 19.6       | 26.4  | 22.7  | 1.6             | 0.96           | 18.7      | 26.1  | 21.1 | 1.4 | 0.98 |
| CN                 | 4.8           | 4.5  | 4.4  | 3.8        | 5.4   | 4.5   | 0.3             | 0.96           | 3.1       | 5.6   | 4.5  | 0.4 | 0.97 |
| FF                 | 44.9          | 52.6 | 46.6 | 37.1       | 65.5  | 49.4  | 5.7             | 0.98           | 34.7      | 52.9  | 43.9 | 4.1 | 0.97 |



|      |      |      |      |      |      |      |     |      |      |      |      |     |      |
|------|------|------|------|------|------|------|-----|------|------|------|------|-----|------|
| FS   | 18   | 18.5 | 16.2 | 16.1 | 22.3 | 19   | 1.3 | 0.97 | 14.5 | 19.3 | 17   | 1   | 0.95 |
| FFTS | 2    | 2.4  | 2.3  | 1.7  | 2.7  | 2.2  | 0.2 | 0.95 | 1.3  | 2.5  | 2.1  | 0.2 | 0.96 |
| FFFS | 2.4  | 2.8  | 2.8  | 2.2  | 3.1  | 2.6  | 0.2 | 0.95 | 2    | 3    | 2.5  | 0.2 | 0.96 |
| SDW  | 418  | 359  | 357  | 305  | 502  | 408  | 36  | 0.99 | 279  | 480  | 370  | 38  | 0.98 |
| R    | 83   | 67   | 61   | 58   | 115  | 79   | 10  | 0.95 | 52   | 94   | 72   | 9   | 0.97 |
| GLPA | 436  | 253  | 346  | 236  | 439  | 335  | 47  | 0.96 | 262  | 478  | 359  | 44  | 0.95 |
| CH   | 513  | 315  | 399  | 307  | 535  | 414  | 52  | 0.95 | 323  | 564  | 431  | 50  | 0.96 |
| GN   | 37.4 | 40.4 | 39.3 | 29.4 | 53.4 | 39.8 | 5.5 | 0.96 | 27.1 | 50   | 38   | 4.2 | 0.99 |
| GW   | 35.8 | 31.1 | 34   | 24.2 | 43.3 | 31.8 | 3.8 | 0.97 | 26.6 | 43.5 | 34.6 | 3.8 | 0.95 |
| GST  | 0.88 | 0.83 | 0.87 | 0.59 | 1.11 | 0.87 | 0.1 | 0.98 | 0.5  | 1.3  | 0.9  | 0.2 | 0.92 |

249 <sup>a</sup> SL: spike length (mm), TS: total spikelets per spike (n° spike<sup>-1</sup>), CN: compactness of the spike (mm node<sup>-1</sup>), FF: fertile  
 250 florets per spike (n° spike<sup>-1</sup>), FS: fertile spikelets per spike (n° spike<sup>-1</sup>), FFTS: fertile florets per total spikelet (n° spikelet<sup>-1</sup>),  
 251 FFFS: fertile florets per fertile spikelet (n° spikelet<sup>-1</sup>), SDW: spike dry weight at anthesis (mg spike<sup>-1</sup>), R: raquis (mg spike<sup>-1</sup>),  
 252 GLPA: glume+lemma+palea+awns (mg spike<sup>-1</sup>), CH: chaff (no-grain spike dry weight at harvest, mg spike<sup>-1</sup>), GN: grain  
 253 number per spike (n° spike<sup>-1</sup>), GW: grain weight (g), GST: grain set.

254 <sup>b</sup> SD: standard error

255 <sup>c</sup> W: A modification of the test of Shapiro-Wilks for normality. Mahibbur and Govindarajulu (1997).

256

257 The phenotypic performances of the GN, FF, SDW, GST and CH in both populations were already described in Pretini et al.  
 258 (2020a). Briefly, the GN ranged from 29.4 to 53.4 and from 27.2 to 50.0 grains per spike in the BP11xB2002 and  
 259 B19xB2002 populations, respectively. The FF ranged from 37.1 to 65.5 and from 34.7 to 52.9 florets per spike in the  
 260 BP11xB2002 and B19xB2002 populations, respectively. The SDW ranged from 304 to 502 and from 279 to 480 mg per  
 261 spike in the BP11xB2002 and B19xB2002 populations. The GST ranged from 0.59 to 1.11 and from 0.5 to 1.3 in the  
 262 BP11xB2002 and B19xB2002 populations, respectively (Table S6).

263 In relation to the traits determining spike structure at anthesis, the highest SL, considering the agronomic environments (E1 to  
 264 E4) and both populations, was observed in E1 (109.5 ± 10.6 and 105.8 ± 10.7 mm, for BP11xB2002 and B19xB2002,  
 265 respectively), while the lowest SL was observed in E2 (93.6 ± 7.4 and 92.5 ± 6.9 mm, for BP11xB2002 and B19xB2002,  
 266 respectively) (Table S6). The E5 showed even a lower SL than E2 with 73.4 ± 8.4 mm (Table S6). The TS ranges for both  
 267 DH populations were similar within the agronomic environments (from 21.3 ± 1.6 to 23.9 ± 1.9 spikelets per spike for  
 268 BP11xB2002 and from 21.0 ± 1.3 to 23.7 ± 2.0 spikelets per spike for B19xB2002, E2 to E1 in both cases); while the lowest  
 269 TS was observed in the non-agronomic environment (E5, 16.2 ± 2.4 spikelets per spike, Table S6). Also, the FS ranges were  
 270 similar between both populations (from 17.5 ± 1.5 to 20.6 ± 1.6 fertile spikelets per spike for BP11xB2002 and from 17.3 ± 1.2  
 271 to 20.1 ± 1.6 fertile spikelets per spike for B19xB2002, E2 to E1 in both cases) and the lowest FS was observed in the E5  
 272 (11.5 ± 1.4 fertile spikelets per spike, Table S6). The lowest CN for both populations was detected in the E2 (4.4 ± 0.3 mm  
 273 per spikelet, Table S6). In contrast, the highest CN varied according to the population x environment combination (for  
 274 BP11xB2002 it was detected in E1 with 4.6 ± 0.4 mm per spikelet, whereas for B19xB2002 it was detected in the E5 with 4.6  
 275 ± 0.5 mm per spikelet, Table S6). In general, for both populations, as the spikes were longer (higher SL), the TS increased,  
 276 and CN decreased (Table S6).

277 The FFTS ranged from 2.0 ± 0.2 to 2.3 ± 0.4 fertile florets per fertile spikelet for BP11xB2002 and from 2.1 ± 0.3 to 2.4 ±  
 278 0.4 fertile florets per fertile spikelet for B19xB2002 (E2 to E1, Table S6). However, the lowest FFTS was detected in the E5  
 279 with 1.7 ± 0.3 fertile florets per fertile spikelet (Table S6). The FFFS ranged from 2.4±0.2 to 2.7±0.2 (E5 to E3) fertile florets

280 per fertile spikelet for BP11xB2002 and from  $2.40 \pm 0.2$  to  $2.6 \pm 0.3$  (E2 to E1) fertile florets per fertile spikelet for B19xB2002  
 281 (Table S6).

282 As regards to the CH at maturity, for both populations within the agronomic environment, it was the highest in E3 ( $598 \pm 132$   
 283 mg per spike for BP11xB2002 and  $663 \pm 104$  mg per spike for B19xB2002) and the lowest in E2 ( $277 \pm 41$  mg per spike for  
 284 BP11xB2002 and  $277 \pm 41$  mg per spike in B19xB2002). The non-agronomic environment E5 reached a similar value to E2  
 285 ( $282 \pm 80$  mg per spike). The spike dry matter partitioning at maturity between R and GLPA varied from 14 to 22% for the R,  
 286 and from 78 to 86% for the GLPA, depending on DH population and environment. Similarly to CH within the agronomic  
 287 environments, the highest R was detected in the E3 ( $97 \pm 19$  mg for BP11xB2002 and  $100 \pm 16$  mg for B19xB2002), and the  
 288 lowest in the E2 ( $60 \pm 10$  mg per spike for BP11xB2002 and  $59 \pm 7$  mg per spike for B19xB2002, Table S6). The R detected  
 289 in the E5 was even lower than the one of E2 ( $48 \pm 13$  mg per spike, Table S6). The GLPA ranged in the agronomic  
 290 environments E3 to E2 from  $217 \pm 35$  to  $502 \pm 116$  mg per spike for BP11xB2002 and from  $215 \pm 39$  to  $564 \pm 93$  mg per  
 291 spike for B19xB2002 (Table S6), being  $234 \pm 70$  mg per spike in E5. The GW ranged from  $31.5 \pm 4.7$  to  $32.6 \pm 5.0$  g (E4-  
 292 E3) for BP11xB2002 and from  $29.2 \pm 3.4$  to  $40.6 \pm 6.1$  g (E2-E5) for B19xB2002 including the non-agronomic trait (Table  
 293 S6).

294 In BP11xB2002, the  $h^2$  ranged from 0.31 to 0.86, with the lowest value in the SDW and the highest value in TS (Table S6).  
 295 Meanwhile, in B19xB2002, the  $h^2$  ranged from 0.36 to 0.68, with the lowest value also in SDW and the highest in FFFS  
 296 (Table S6).

297

### 298 3.3. QTL Mapping Analysis

299 A total of 305 QTL were identified across 5 environments and BLUE distributed on the 21 chromosomes (Table S7).  
 300 However, only 28 QTL were present in at least 3 individual environments or BLUE analysis with a LOD > 2.5 considering a  
 301 single population or a combination of both populations but with the contribution of the same germplasm (Baguette or B2002)  
 302 and were considered stable with  $R^2 > 10\%$  in one environment at least (Table 4). Those stable QTL were distributed on the  
 303 1A, 2A, 2B, 2D, 3A, 3B, 5A, 5B, 6A, 6B, 7A and 7B chromosomes (Table 4).

304

305 Table 4. Stable and major QTL identified for spike fertility related traits in both populations.

| Trait <sup>a</sup> | QTL                | Pop <sup>b</sup> | Env <sup>c</sup>         | Closest marker               | Distance (cM) | IWGSC Ref Seq v1.0 (Mb) | LOD   | Donnor | Add <sup>d</sup> | R <sup>2</sup> |
|--------------------|--------------------|------------------|--------------------------|------------------------------|---------------|-------------------------|-------|--------|------------------|----------------|
| SL                 | <i>QSL.perg-2B</i> | BP11xB2002       | BLUE                     | w SNP_Ex_rep_c70228_69172301 | 77.6          | 389.5                   | 4.80  | B2002  | 3.2              | 16.4%          |
|                    |                    |                  | E1                       | RAC875_c27297_2153           | 78.6          | 385.2                   | 3.62  | B2002  | 3.8              | 11.9%          |
|                    |                    |                  | E2                       | RAC875_c27297_2153           | 78.6          | 385.2                   | 5.12  | B2002  | 3.1              | 16.6%          |
| <i>QSL.perg-5A</i> | B19xB2002          | E5               | BS00022003_51            | 41.2                         | 444.8         | 2.84                    | B2002 | 2.0    | 8.4%             |                |
|                    |                    | E2               | w SNP_Ex_c19647_28632894 | 44.2                         | 470.0         | 3.68                    | B2002 | 2.4    | 11.6%            |                |
|                    |                    | E3               | Kukri_rep_c72046_78      | 48.8                         | 512.2         | 7.99                    | B2002 | 4.0    | 24.0%            |                |
|                    |                    | BLUE             | Kukri_rep_c72046_78      | 48.8                         | 512.2         | 9.56                    | B2002 | 3.4    | 27.8%            |                |
|                    |                    | E1               | BS00022818_51            | 49.3                         | 524.2         | 4.50                    | B2002 | 3.9    | 14.9%            |                |
|                    |                    | E3               | Tdurum_contig16244_105   | 36.1                         | 68.9          | 6.57                    | B2002 | 3.7    | 17.0%            |                |
| <i>QSL.perg-7A</i> | BP11xB2002         | E3               | Tdurum_contig16244_105   | 36.1                         | 68.9          | 6.57                    | B2002 | 3.7    | 17.0%            |                |
|                    |                    | BLUE             | w SNP_Ku_c57198_60433631 | 42.2                         | 78.4          | 3.99                    | B2002 | 2.7    | 12.4%            |                |

|                    |                      |                    |                       |                              |                         |                         |           |       |       |       |       |       |
|--------------------|----------------------|--------------------|-----------------------|------------------------------|-------------------------|-------------------------|-----------|-------|-------|-------|-------|-------|
|                    |                      |                    | E2                    | wsnp_Ra_rep_c69620_67130107  | 45.1                    | 85.6                    | 2.92      | B2002 | 2.2   | 8.5%  |       |       |
|                    |                      |                    | E1                    | wsnp_Ra_rep_c69620_67130107  | 46.1                    | 85.6                    | 3.41      | B2002 | 4.3   | 14.5% |       |       |
| <b>TS</b>          | <i>QTS.perg-2D</i>   | BP11xB2002         | E3                    | Tdurum_contig17626_210       | 60.5                    | 571.5                   | 5.02      | B2002 | 0.9   | 24.1% |       |       |
|                    |                      |                    | E2                    | Tdurum_contig17626_210       | 65.5                    | 571.5                   | 4.43      | B2002 | 0.8   | 17.0% |       |       |
|                    |                      |                    | BLUE                  | Tdurum_contig17626_210       | 68.1                    | 571.5                   | 8.32      | B2002 | 0.8   | 21.0% |       |       |
|                    |                      |                    | E1                    | RAC875_c11093_174            | 82.4                    | 590.1                   | 10.1<br>2 | B2002 | 1.0   | 24.8% |       |       |
|                    |                      |                    |                       |                              |                         |                         |           |       |       |       |       |       |
|                    | <i>QTS.perg-3A</i>   | B19xB2002          | E5                    | RAC875_c77648_367            | 3.4                     | 12.2                    | 5.99      | B2002 | 1.0   | 15.7% |       |       |
|                    |                      |                    | BLUE                  | Excalibur_c62042_175         | 5.4                     | 13.9                    | 5.79      | B2002 | 0.7   | 17.2% |       |       |
|                    |                      |                    | E1                    | Kukri_rep_c75764_60          | 8.1                     | 20.1                    | 5.02      | B2002 | 0.8   | 20.6% |       |       |
|                    | <i>QTS.perg-7A</i>   | BP11xB2002         | BLUE                  | Ku_c68368_1724               | 138.1                   | 701.6                   | 3.82      | B2002 | 0.5   | 8.2%  |       |       |
|                    |                      |                    | E1                    | wsnp_Ku_c16022_24798741      | 143.2                   | 725.9                   | 3.02      | B2002 | 0.5   | 5.7%  |       |       |
| B19xB2002          |                      | E3                 | IAAV6957              | 90.5                         | 675.2                   | 5.96                    | B2002     | 0.6   | 19.8% |       |       |       |
| <b>CN</b>          | <i>QCN.perg-2A</i>   | BP11xB2002         | E3                    | BS00091763_51                | 83.0                    | 773.2                   | 3.82      | B2002 | 0.13  | 14.0% |       |       |
|                    |                      |                    | B19xB2002             | E1                           | BobWhite_c17113_240     | 81.1                    | 751.6     | 3.06  | B2002 | 0.13  | 10.8% |       |
|                    |                      |                    | BLUE                  | Excalibur_c35919_107         | 83.7                    | 754.5                   | 5.07      | B2002 | 0.15  | 16.9% |       |       |
|                    |                      |                    | E5                    | wsnp_Ex_c2137_4014287        | 86.6                    | 755.9                   | 4.88      | B2002 | 0.20  | 15.1% |       |       |
|                    | <i>QCN.perg-5A</i>   | BP11xB2002         | E2                    | wsnp_Ex_c24215_33462239      | 57.1                    | 526.6                   | 9.44      | B2002 | 0.16  | 31.2% |       |       |
|                    |                      |                    | BLUE                  | wsnp_Ex_c24215_33462239      | 57.1                    | 526.6                   | 9.46      | B2002 | 0.16  | 26.5% |       |       |
|                    |                      | B19xB2002          | E3                    | Kukri_rep_c72046_78          | 48.8                    | 512.2                   | 5.48      | B2002 | 0.13  | 19.6% |       |       |
|                    | <b>FF</b>            | <i>QFF.perg-2B</i> | BP11xB2002            | E3                           | JD_c10643_840           | 89.6                    | 683.2     | 4.85  | B2002 | 3.75  | 14.8% |       |
|                    |                      |                    |                       | B19xB2002                    | E3                      | Tdurum_contig12879_1200 | 64.2      | 712.6 | 7.85  | B2002 | 3.81  | 30.7% |
|                    |                      |                    |                       | E2                           | Kukri_rep_c68903_301    | 65.1                    | 730.2     | 7.15  | B2002 | 3.32  | 32.7% |       |
| BLUE               |                      |                    |                       | Kukri_rep_c68903_301         | 65.7                    | 730.2                   | 8.67      | B2002 | 2.66  | 32.7% |       |       |
| <i>QFF.perg-7B</i> |                      | B19xB2002          | BLUE                  | Kukri_c51101_351             | 61.2                    | 630.1                   | 5.12      | B19   | 1.73  | 15.7% |       |       |
|                    |                      |                    | E3                    | Tdurum_contig47633_304       | 65.2                    | 659.7                   | 3.00      | B19   | 2.07  | 10.0% |       |       |
|                    | E1                   |                    | Tdurum_contig4658_106 | 71.7                         | 680.2                   | 4.56                    | B19       | 3.61  | 17.2% |       |       |       |
| <b>FS</b>          | <i>QFS.perg-2B</i>   | BP11xB2002         | E3                    | BS00064318_51                | 86.8                    | 686.0                   | 8.01      | B2002 | 0.78  | 20.2% |       |       |
|                    |                      |                    | B19xB2002             | E3                           | Tdurum_contig12879_1200 | 64.2                    | 712.6     | 3.28  | B2002 | 0.43  | 11.0% |       |
|                    |                      |                    | E2                    | RAC875_c81984_707            | 64.6                    | 719.8                   | 4.57      | B2002 | 0.52  | 16.8% |       |       |
|                    |                      |                    | BLUE                  | RAC875_c81984_707            | 64.6                    | 719.8                   | 4.64      | B2002 | 0.44  | 15.5% |       |       |
|                    | <i>QFS.perg-3A</i>   | B19xB2002          | E3                    | Excalibur_c62042_175         | 5.4                     | 13.9                    | 3.28      | B2002 | 0.41  | 11.6% |       |       |
|                    |                      |                    | E2                    | Kukri_rep_c75764_60          | 8.1                     | 20.1                    | 2.83      | B2002 | 0.36  | 9.8%  |       |       |
|                    |                      |                    | E1                    | BS00049032_51                | 10.6                    | 25.9                    | 5.37      | B2002 | 0.78  | 23.1% |       |       |
|                    | <i>QFS.perg-5B</i>   | BP11xB2002         | E2                    | RFL_Contig5461_683           | 48.7                    | 580.4                   | 8.67      | B2002 | 0.88  | 32.1% |       |       |
|                    |                      |                    | BLUE                  | RFL_Contig5461_683           | 48.7                    | 580.4                   | 4.36      | B2002 | 0.46  | 10.9% |       |       |
|                    |                      | B19xB2002          | E2                    | Vrn-B1: Excalibur_c5329_1335 | 65.3                    | 580.7                   | 4.17      | B2002 | 0.47  | 14.3% |       |       |
| <b>FFTS</b>        | <i>QFFTS.perg-5A</i> | BP11xB2002         | E3                    | wsnp_Ex_c24215_33462239      | 57.1                    | 526.6                   | 3.25      | BP11  | 0.11  | 10.1% |       |       |
|                    |                      |                    | B19xB2002             | E3                           | wsnp_CAP11_c1740_947838 | 51.3                    | 536.7     | 4.17  | B19   | 0.10  | 17.4% |       |

|                  |                      |            |      |                               |       |       |           |       |      |       |
|------------------|----------------------|------------|------|-------------------------------|-------|-------|-----------|-------|------|-------|
|                  |                      |            | E1   | RAC875_rep_c107228_92         | 70.5  | 567.7 | 3.12      | B19   | 0.13 | 14.3% |
|                  |                      |            | BLUE | RAC875_rep_c107228_92         | 70.5  | 567.7 | 3.24      | B19   | 0.09 | 13.1% |
|                  | <i>QFFTS.perg-5B</i> | BP11xB2002 | E2   | w SNP_Ku_c35090_44349517      | 9.3   | 34.3  | 5.68      | BP11  | 0.09 | 18.0% |
|                  |                      |            | E1   | Kukri_rep_c71114_838          | 12.9  | 70.3  | 3.93      | BP11  | 0.14 | 12.6% |
|                  |                      |            | BLUE | Kukri_rep_c71114_838          | 12.9  | 70.3  | 8.53      | BP11  | 0.15 | 30.2% |
|                  |                      |            | E3   | Ex_c68034_498                 | 15.0  | 21.5  | 6.06      | BP11  | 0.16 | 20.8% |
| <b>FFFS</b>      | <i>QFFFS.perg-7B</i> | B19xB2002  | BLUE | BS00063208_51                 | 61.7  | 637.6 | 5.69      | B19   | 0.09 | 19.2% |
|                  |                      |            | E3   | Kukri_c100592_82              | 62.7  | 648.1 | 4.41      | B19   | 0.10 | 16.3% |
|                  |                      |            | E1   | RAC875_c60191_114             | 71.7  | 697.1 | 5.06      | B19   | 0.15 | 21.8% |
| <b>R</b>         | <i>QR.perg-2A</i>    | BP11xB2002 | E1   | w SNP_CAP8_c1580_908907       | 19.6  | 33.3  | 8.51      | BP11  | 8.0  | 27.1% |
|                  |                      |            | BLUE | w SNP_CAP8_c1580_908907       | 19.6  | 33.3  | 5.91      | BP11  | 4.2  | 14.5% |
|                  |                      | B19xB2002  | E5   | Kukri_c17467_2711             | 0.0   | 4.7   | 2.54      | B19   | 3.3  | 5.3%  |
|                  | <i>QR.perg-3B</i>    | BP11xB2002 | E2   | Jagger_c522_55                | 66.2  | 730.2 | 5.21      | BP11  | 4.4  | 16.4% |
|                  |                      |            | E3   | Kukri_rep_c94476_152          | 77.7  | 745.7 | 3.12      | BP11  | 9.5  | 22.6% |
|                  |                      |            | E4   | CAP12_c2348_133               | 86.1  | 732.4 | 4.62      | BP11  | 4.4  | 16.1% |
|                  |                      |            | BLUE | Excalibur_c18410_136          | 89.3  | 752.1 | 7.65      | BP11  | 5.2  | 21.1% |
|                  | <i>QR.perg-6A</i>    | BP11xB2002 | E3   | Tdurum_contig100733_89        | 33.7  | 22.0  | 4.91      | B2002 | 8.4  | 19.1% |
|                  |                      |            | BLUE | RFL_Contig2954_548            | 69.5  | 23.9  | 4.19      | B2002 | 3.0  | 7.4%  |
|                  |                      | B19xB2002  | E1   | BobWhite_c3714_659            | 47.0  | 8.0   | 2.66      | B2002 | 5.6  | 11.0% |
|                  |                      |            | BLUE | BS00083630_51                 | 52.8  | 5.6   | 7.02      | B2002 | 5.5  | 26.9% |
| <b>GLP<br/>A</b> | <i>QGLPA.perg-1A</i> | B19xB2002  | BLUE | w SNP_Ex_c4310_7770452        | 144.4 | 464.3 | 10.8<br>5 | B2002 | 27   | 32.7% |
|                  |                      |            | E1   | RAC875_c53185_802             | 148.4 | 480.5 | 5.84      | B2002 | 30   | 21.3% |
|                  |                      |            | E4   | RAC875_c53185_802             | 148.4 | 480.5 | 5.70      | B2002 | 33   | 21.9% |
|                  | <i>QGLPA.perg-3A</i> | B19xB2002  | BLUE | Excalibur_c46600_919          | 44.9  | 648.0 | 2.54      | B2002 | 11   | 5.9%  |
|                  |                      |            | E1   | Kukri_c18420_705              | 51.2  | 663.2 | 3.13      | B2002 | 19   | 9.1%  |
|                  |                      |            | E5   | Tdurum_contig15928_135        | 75.0  | 709.1 | 3.98      | B2002 | 24   | 11.0% |
|                  | <i>QGLPA.perg-5B</i> | BP11xB2002 | BLUE | RAC875_c60758_623             | 64.3  | 597.2 | 5.11      | BP11  | 18   | 13.2% |
|                  |                      |            | E3   | BS00037023_51                 | 72.3  | 654.5 | 3.15      | BP11  | 41   | 14.6% |
|                  |                      | B19xB2002  | E5   | Tdurum_contig13773_321        | 69.4  | 595.7 | 6.51      | B19   | 36   | 24.4% |
|                  | <i>QGLPA.perg-7A</i> | BP11xB2002 | BLUE | Kukri_c64330_58               | 33.3  | 62.9  | 3.02      | B2002 | 13   | 7.3%  |
|                  |                      |            | E3   | Tdurum_contig82510_556        | 37.5  | 76.9  | 2.95      | B2002 | 33   | 10.0% |
|                  |                      | B19xB2002  | E1   | IACX17522                     | 34.8  | 57.9  | 3.73      | B2002 | 25   | 11.2% |
| <b>CH</b>        | <i>QCH.perg-1A</i>   | B19xB2002  | BLUE | w SNP_Ex_c4310_7770452        | 144.2 | 464.3 | 9.55      | B2002 | 29   | 29.4% |
|                  |                      |            | E4   | RAC875_c53185_802             | 148.4 | 480.5 | 5.21      | B2002 | 37   | 20.9% |
|                  |                      |            | E1   | BS00023126_51                 | 157.4 | 480.6 | 5.15      | B2002 | 36   | 22.0% |
|                  | <i>QCH.perg-2B</i>   | BP11xB2002 | E1   | w SNP_Ra_c4126_7552133        | 84.0  | 409.3 | 5.98      | B2002 | 35   | 25.0% |
|                  |                      |            | E3   | Kukri_rep_c91092_553          | 84.8  | 442.3 | 3.83      | B2002 | 48   | 13.7% |
|                  |                      | B19xB2002  | E3   | w SNP_Ex_rep_c104478_89183627 | 57.1  | 447.8 | 2.82      | B2002 | 35   | 10.0% |

|           |                    |            |      |                        |      |       |      |       |     |       |
|-----------|--------------------|------------|------|------------------------|------|-------|------|-------|-----|-------|
| <b>GN</b> | <i>QGN.perg-5A</i> | B19xB2002  | E2   | BS00083507_51          | 42.2 | 461.5 | 4.56 | B19   | 1.8 | 14.6% |
|           |                    |            | E5   | BS00083507_51          | 42.2 | 461.5 | 3.89 | B19   | 2.3 | 14.5% |
|           |                    |            | BLUE | Ex_c19057_965          | 44.7 | 473.6 | 5.00 | B19   | 1.8 | 17.5% |
| <b>GW</b> | <i>QGW.perg-5A</i> | BP11xB2002 | E3   | Tdurum_contig67291_367 | 78.1 | 573.8 | 5.59 | BP11  | 3.0 | 20.1% |
|           |                    |            | BLUE | Tdurum_contig67291_367 | 78.1 | 573.8 | 3.12 | BP11  | 1.2 | 8.1%  |
|           |                    | B19xB2002  | E3   | BS00032146_51          | 79.8 | 615.2 | 3.36 | B19   | 1.5 | 12.8% |
|           | <i>QGW.perg-6B</i> | B19xB2002  | E4   | Kukri_rep_c117390_70   | 43.4 | 127.6 | 7.13 | B2002 | 1.7 | 21.6% |
|           |                    |            | E2   | Kukri_c38398_164       | 45.5 | 135.1 | 5.15 | B2002 | 1.6 | 14.0% |
|           |                    |            | BLUE | Kukri_c38398_164       | 45.5 | 135.1 | 5.73 | B2002 | 1.8 | 18.2% |

306

307 <sup>a</sup> SL: spike length (mm), TS: total spikelets per spike (n° spike<sup>-1</sup>), CN: compactness of the spike (mm node<sup>-1</sup>), FF: fertile  
 308 florets per spike (n° spike<sup>-1</sup>), FS: fertile spikelets per spike (n° spike<sup>-1</sup>), FFTS: fertile florets per total spikelet (n° spikelet<sup>-1</sup>),  
 309 FFFS: fertile florets per fertile spikelet (n° spikelet<sup>-1</sup>), R: raquis (mg spike<sup>-1</sup>), GLPA: glume+lemma+palea+awns (mg spike<sup>-1</sup>),  
 310 CH: chaff (no-grain spike dry weight at harvest mg spike<sup>-1</sup>), GN: grain number (n° spike<sup>-1</sup>), GW: grain weight (g).

311 <sup>b</sup> Population BP11xB2002, Baguette Premium 11 x BioINTA 2002 population; B19xB2002, Baguette 19 x BioINTA 2002.

312 <sup>c</sup> Environment E1: Pergamino 2012, E2: Pergamino 2013, E3: Pergamino 2015, E4: Marcos Juárez 2015, E5: Pergamino  
 313 2016, BLUE.

314 <sup>b</sup> Add, additive effects: contribution of parent's alleles to the larger values.

315

### 316 3.3.1. QTL for SL

317 The QTL analysis identified 19 regions for SL on chromosomes 1A, 1B, 2A, 2B, 2D, 3B, 4B, 5A, 5B, 6A, 6D and 7A with a  
 318 LOD score that ranged from 2.54 to 9.56, explaining 4.7-27.8% of the phenotypic variance (Table S7). However, three QTL  
 319 on chromosomes 2B (*QSL.perg-2B*), 5A (*QSL.perg-5A*) and 7A (*QSL.perg-7A*) were consider major and stable across  
 320 environments. Both QTL detected for *QSL.perg-2B* and *QSL.perg-7A* were from the BP11xB2002 population while the  
 321 *QSL.perg-5A* was detected in the B19xB2002 population (Table 4).

322 The QTL peak of *QSL.perg-2B* was mapped at the RAC875\_c27297\_2153 SNP marker (78.6 cM, 385.2 Mb) with a LOD of  
 323 5.12 and a R<sup>2</sup> of 16.6% (Table 4). The QTL peak of *QSL.perg-5A* was mapped at the Kukri\_rep\_c72046\_78 SNP marker  
 324 (48.8 cM, 512.2 Mb) with a LOD of 9.56 and a R<sup>2</sup> of 27.8% (Table 4). Finally, the QTL peak of *QSL.perg-7A* was mapped at  
 325 the Tdurum\_contig16244\_105 SNP marker (36.1 cM, 68.9 Mb) with a LOD of 6.57 and a R<sup>2</sup> of 17.0% (Table 4). The  
 326 increasing allele was always contributed by B2002 with an additive effect that ranged from 3.1 to 3.8 mm for *QSL.perg-2B*,  
 327 from 2.0 to 4.0 mm for *QSL.perg-5A* and from 2.2 to 4.3 mm for *QSL.perg-7A* (Table 4).

328

### 329 3.3.2. QTL for TS

330 The QTL analysis identified 24 regions for TS on chromosomes 1B, 1D, 2A, 2B, 2D, 3A, 4B, 5A, 5B, 5D, 6A, 6B, 7A and  
 331 7B with a LOD score that ranged from 2.77 to 10.12, explaining 5.7-28.2% of the phenotypic variance (Table S7). However,  
 332 three QTL on chromosomes 2D (*QTS.perg-2D*), 3A (*QTS.perg-3A*) and 7A (*QTS.perg-7A*) were considered major and stable  
 333 across environments. The *QTS.perg-2D* was detected in the BP11xB2002 population while the *QTS.perg-3A* was observed in

334 the B19xB2002 population (Table 4). The *QTS.perg-7A* was detected in two environments in the BP11xB2002 population  
335 (E1 and BLUE), and in one environment if the B19xB2002 population (E3, Table 4).

336 The QTL peak of *QTS.perg-2D* was mapped at the RAC875\_c11093\_174 SNP marker (82.4 cM, 590.1 Mb) with a LOD of  
337 10.12 and  $R^2$  of 24.8% (Table 4). The QTL peak of *QTS.perg-3A* was mapped at the RAC875\_c77648\_367 SNP marker (3.4  
338 cM, 12.2 Mb) with a LOD of 5.99 and  $R^2$  of 15.7% (Table 4). Finally, the QTL peak of *QTS.perg-7A* was mapped at the  
339 IAAV6957 SNP marker (90.5 cM, 675.2 Mb) with a LOD of 5.96 and a  $R^2$  of 19.8% (Table 4). The increasing allele for all  
340 the QTL were contributed by B2002 with an additive effect that ranged from 0.8 to 1.0 total spikelets per spike for *QTS.perg-*  
341 *2D*, from 0.7 to 1.0 total spikelets per spike for *QTS.perg-3A* and from 0.5 to 0.6 total spikelets per spike for *QTS.perg-7A*  
342 (Table 4).

343

### 344 3.3.3. QTL for CN

345 The QTL analysis identified 22 QTL for CN on chromosomes 1B, 1D, 2A, 3A, 3B, 4B, 5A, 5B, 6A, 6D, 7A and 7B with a  
346 LOD score that ranged from 2.55 to 9.46, explaining 6.7-31.2% of the phenotypic variance (Table S7). However, two QTL  
347 on chromosomes 2A (*QCN.perg-2A*) and 5A (*QCN.perg-5A*) were considered major and stable across environments. The  
348 QTL were identified in both populations. The *QCN.perg-2A* was detected in one environment in BP11xB2002 (E3) and in  
349 three environments in B19xB2002 (E1, E5 and BLUE). The *QCN.perg-5A* was detected in two environments in  
350 BP11xB2002 (E2 and BLUE) and in one environment in B19xB2002 (E3, Table 4).

351 The peak of *QCN.perg-2A* was mapped at the Excalibur\_c35919\_107 SNP marker (83.7 cM, 754.5 Mb) with a LOD of 5.07  
352 and a  $R^2$  of 16.9% (Table 4). The peak of *QCN.perg-5A* was mapped at the wsnp\_Ex\_c24215\_33462239 SNP marker (57.1  
353 cM, 526.6 Mb) with a LOD of 9.46 and  $R^2$  of 26.5% (Table 4). The increasing allele for both QTL was contributed by B2002  
354 and had an additive effect ranged from 0.13 to 0.20 mm per node (Table 4).

355

### 356 3.3.4. QTL for FF

357 The QTL analysis identified 18 regions for FF on chromosomes 1A, 2A, 2B, 3A, 3B, 3D, 4B, 5A, 5B, 5D, 6A and 7B. The  
358 LOD score ranged from 2.54 to 7.85, explaining 5.5-32.7% of the phenotypic variation (Table S7). However, two QTL on  
359 chromosomes 2B (*QFF.perg-2B*) and 7B (*QFF.perg-7B*) were consider major and stable across environments. *QFF.perg-2B*  
360 was detected in one environment in BP11xB2002 (E3) and three environments in B19xB2002 (E2, E3 and BLUE, Table 4).  
361 While the *QFF.perg-7B* was detected in three environments of the B19xB2002 population (Table 4).

362 The QTL peak of *QFF.perg-2B* was mapped at the Kukri\_rep\_c68903\_301 SNP marker (65.7 cM, 730.2 Mb) with a LOD of  
363 8.67 and a  $R^2$  of 32.7% (Table 4). The increasing allele of *QFF.perg-2B* was contributed by B2002 and had a significant  
364 additive effect that ranged from 3.3 to 3.8 fertile florets per spike. The QTL peak of *QFF.perg-7B* was mapped at the  
365 Kukri\_c51101\_351 SNP marker (61.2 cM, 630.1 Mb) with a LOD of 5.12 and a  $R^2$  of 15.7% (Table 4). The increasing allele  
366 of *QFF.perg-7B* was contributed by the B19 and had a significant additive effect that ranged from 1.7-3.6 fertile florets per  
367 spike (Table 4).

368



369 3.3.5. QTL for FS

370 The QTL analysis identify 23 regions for FS on chromosomes 1D, 2A, 2B, 3A, 3B, 3D, 4A, 5A, 5B, 5D, 6A, 6B, 7A and 7B  
371 with a LOD score that ranged from 2.55 to 8.67, explaining 6.2-32.1% of the phenotypic variance (Table S7). However, three  
372 QTL on chromosomes 2B (*QFS.perg-2B*), 3A (*QFS.perg-3A*) and 5B (*QFS.perg-5B*) were considered major and stable  
373 across environments. The *QFS.perg-2B* was detected in one environment in B11xB2002 (E3) and in three environments in  
374 B19xB2002 (E2, E3 and BLUE, Table 4). The *QFS.perg-3A* was detected in three environments in the B19xB2002  
375 population (E1, E2 and E3) (Table 4). Finally, the *QFS.perg-5B* was detected in two environments in BP11xB2002 (E2 and  
376 BLUE) and in one environment in B19xB2002 (E2, Table 4).

377 The QTL peak of *QFS.perg-2B* was mapped at the BS00064318\_51 SNP marker (86.8 cM, 686.0 Mb) with a LOD of 8.01  
378 and a  $R^2$  of 20.2% (Table 4). The QTL peak of *QFS.perg-3A* was mapped at the BS00049032\_51 SNP marker (10.6 cM, 25.9  
379 Mb) with a LOD of 5.37 and a  $R^2$  of 23.1% (Table 4). Finally, the QTL peak of *QFS.perg-5B* was mapped at the  
380 RFL\_Contig5461\_683 SNP marker (48.7 cM, 580.4 Mb) with a LOD of 8.67 and a  $R^2$  of 32.1% (Table 4). The increasing  
381 allele was always contributed by B2002 with an additive effect that ranged from 0.4 to 0.9 fertile spikelets per spike (Table  
382 4).

383

384 3.3.6. QTL for FFTS

385 The QTL analysis identified 21 regions for FFTS on the chromosomes 1B, 2A, 2B, 2D, 3A, 3B, 3D, 4B, 5A, 5B, 6A, 7A, 7B  
386 and 7D with a LOD score that ranged from 2.52 to 8.53, explaining 7.3-30.8% of the phenotypic variance (Table S7).  
387 However, two QTL on chromosomes 5A (*QFFTS.perg-5A*) and 5B (*QFFTS.perg-5B*) were considered major and stable  
388 across environments. The *QFFTS.perg-5A* was detected in one environment in BP11xB2002 (E3) and in three environments  
389 in B19xB2002 (E1, E3 and BLUE) while the *QFFTS.perg-5B* was were detected in four environments in BP11xB2002 (E1,  
390 E2, E3 and BLUE) (Table 4).

391 The QTL peak for *QFFTS.perg-5A* was mapped at the wsnp\_CAP11\_c1740\_947838 SNP (51.3 cM, 536.7 Mb) with a LOD  
392 of 4.17 and a  $R^2$  of 17.4% (Table 4). The QTL peak for *QFFTS.perg-5B* was mapped at the Kukri\_rep\_c71114\_838 SNP  
393 (12.9 cM, 70.3 Mb) with a LOD of 8.53 and a  $R^2$  of 30.2% (Table 4). For both QTL, the increasing allele was contributed by  
394 the Baguette parents with an additive effect that ranged from 0.09 to 0.13 and from 0.9 to 0.16 fertile florets per total spikelet  
395 per spike for *QFFTS.perg-5A* and *QFFTS.perg-5B*, respectively (Table 4).

396

397 3.3.7. QTL for FFFS

398 The QTL analysis identified 22 QTL for FFFS on chromosomes 1A, 1B, 2A, 2B, 3A, 3B, 4A, 4B, 5A, 5B, 6B, 7A, 7B and  
399 7D with a LOD score that ranged from 2.58 to 7.65, explaining 6.8-25.4% of the phenotypic variance (Table S7). However,  
400 only one QTL on chromosome 7B (*QFFFS.perg-7B*) was considered major and stable across environments. This QTL was  
401 detected in the B19xB2002 population (Table 4).

402 The peak of *QFFFS.perg-7B* was mapped at the BS00063208\_51 (61.7 cM, 637.3 Mb) with a LOD of 5.69 and a  $R^2$  of  
403 19.2% (Table 4). The increasing allele was contributed by B19 with an additive effect that ranged from 0.09 to 0.15 fertile  
404 florets per fertile spikelet per spike (Table 4).

405

406

### 407 3.3.8. QTL for SDW

408 The QTL analysis identified 24 regions for SDW on chromosomes 1A, 1B, 2B, 2D, 3B, 3D, 4A, 4B, 4D, 5A, 5B, 7A, 7B and  
409 7D with a LOD score that ranged from 2.52 to 7.20 explaining 0.4-37.3% of the phenotypic variance (Table S7). However,  
410 no QTL was considered major and stable across environments.

411

### 412 3.3.9. QTL for R

413 The QTL analysis identified 31 QTL for R on chromosomes 1A, 2A, 2B, 2D, 3A, 3B, 3D, 4A, 4B, 4D, 5A, 5B, 6A, 6B, 6D  
414 and 7B with a LOD score that ranged from 2.54 to 8.76, explaining 5.1-30.2% of the phenotypic variance (Table S7).  
415 However, three QTL on chromosomes 2A (*QR.perg-2A*), 3B (*QR.perg-3B*) and 6A (*QR.perg-6A*) were considered major and  
416 stable across environments. The *QR.perg-3B* was only detected in BP11xB2002 while the *QR.perg-2A* and *QR.perg-6A* were  
417 detected in both populations. The *QR.perg-2A* was detected in two environments in BP11xB2002 (E1, BLUE) and in one  
418 environment in B19xB2002 (E5) (Table 4). While the *QR.perg-6A* was detected in two environments for each DH population  
419 (Table 4).

420 The peak of *QR.perg-2A* was mapped at the wsnp\_CAP8\_c1580\_908907 SNP marker (19.6 cM, 33.3 Mb) with a LOD of  
421 8.51 and  $R^2$  of 27.1% (Table 4). The peak of *QR.perg-3B* was mapped at the Ku Excalibur\_c18410\_136 SNP marker (89.3  
422 cM, 752.1 Mb) with a LOD of 7.65 and  $R^2$  of 21.2% (Table 4). Finally, the peak of *QR.perg-6A* was mapped at the  
423 BS00083630\_51 SNP marker (52.8 cM, 5.6 Mb) with a LOD of 7.02 and a  $R^2$  of 26.9% (Table 4). The increasing allele of  
424 *QR.perg-2A* and *QR.perg-3B* was contributed by the Baguette parents with an additive effect that ranged from 42 to 80 and  
425 from 44 to 95 mg per spike, respectively. In contrast, the increasing allele of *QR.perg-6A* was contributed by B2002 with an  
426 additive effect that ranged from 30 to 84 mg per spike (Table 4).

427

### 428 3.3.10. QTL for GLPA

429 The QTL analysis identified 23 QTL for GLPA on chromosomes 1A, 1B, 1D, 2B, 2D, 3A, 3B, 4B, 5A, 5B, 5D, 6A, 7A and  
430 7B with a LOD score that ranged from 2.53 to 10.85, explaining 5.6-32.7% of the phenotypic variance (Table S7). However,  
431 four QTL on chromosomes 1A (*QGLPA.perg-1A*), 3A (*QGLPA.perg-3A*), 5B (*QGLPA.perg-5B*) and 7A (*QGLPA.perg-7A*)  
432 were considered major and stable across environments. The *QGLPA.perg-1A* and *QGLPA.perg-3A* were detected in  
433 BP19xB2002, while the *QGLPA.perg-5B* and *QGLPA.perg-7A* were detected in both populations. The *QGLPA.perg-5B* and  
434 *QGLPA.perg-7A* were detected in two environments in BP11xB2002 and in one environment in B19xB2002 (Table 4).

435 The peak of *QGLPA.perg-1A* was mapped at the wsnp\_Ex\_c4310\_7770452 SNP marker (144.4 cM, 464.3 Mb) with a LOD  
436 of 10.85 and a  $R^2$  of 32.2% (Table 4). The peak of *QGLPA.perg-3A* was mapped at the Tdurum\_contig15928\_135 SNP  
437 marker (75.0 cM, 709.1 Mb) with a LOD of 3.98 and a  $R^2$  of 11.0% (Table 4). The peak of *QGLPA.perg-5B* was mapped at  
438 the Tdurum\_contig13773\_321 (69.4 cM, 595.7 Mb) with a LOD of 6.52 and a  $R^2$  of 24.4% (Table 4). Finally, the peak of  
439 *QGLPA.perg-7A* was mapped at the IACX17522 SNP marker (34.8 cM, 57.9 Mb) with a LOD of 3.73 and a  $R^2$  of 11.2%  
440 (Table 4). The increasing allele for *QGLPA.perg-1A*, *QGLPA.perg-3A* and *QGLPA.perg-7A* was contributed by B2002, with  
441 an additive effect that ranged from 27 to 33, from 11 to 24 and from 13 to 33 mg per spike, respectively (Table 4). On the

442 other and, the increasing allele for *QGLPA.perg-5B* was contributed by the Baguette parent with an additive effect that  
443 ranged from 18 to 41 mg per spike (Table 4).

444

#### 445 3.3.11. QTL for CH

446 The QTL analysis identified 25 QTL for CH on chromosomes 1A, 1B, 1D, 2A, 2B, 2D, 3A, 3B, 5A, 5B, 6A, 7A, 7B and 7D  
447 with a LOD score that ranged from 2.53 to 9.55, explaining 6.4-35.9% of the phenotypic variance (Table S7). However, two  
448 QTL on chromosomes 1A (*QCH.perg-1A*) and 2B (*QCH.perg-2B*) were considered major and stable across environments.  
449 The *QCH.perg-1A* was detected in B19xB2002 while the *QCH.perg-2B* was detected in two environments in B11xB2002  
450 (E1 and E3) and in one environment in B19xB2002 (E3) (Table 4).

451 The peak of *QCH.perg-1A* was mapped at the *w SNP\_Ex\_c4310\_7770452* SNP marker (144.2 cM, 464.3 Mb) with a LOD of  
452 9.55 and a  $R^2$  of 29.4% (Table 4). The peak of *QCH.perg-2B* was mapped at the *w SNP\_Ra\_c4126\_7552133* SNP marker  
453 (84.0 cM, 409.3 Mb) with a LOD of 5.98 and a  $R^2$  of 25% (Table 4). In both cases, the increasing allele was contributed by  
454 B2002, with an additive effect that ranged from 29 to 37 mg for *QCH.perg-1A* and from 35 to 48 mg for *QCH.perg-2B*  
455 (Table 4).

456

#### 457 3.3.12. QTL for GN

458 The QTL analysis identified 18 QTL for GN on chromosomes 1D, 2A, 2B, 3D, 4D, 5A, 5B, 5D, 6A, 6D, 7B and 7D with a  
459 LOD score that ranged from 2.52 to 6.60, explaining 8.0-35.0% of the phenotypic variance (Table S7). However, only one  
460 QTL on chromosome 5A (*QGN.perg-5A*) was considered major and stable across environments. In this case, the QTL was  
461 detected in B19xB2002 (Table 4).

462 The peak of *QGN.perg-5A* was mapped at the *Ex\_c19057\_965* SNP marker (44.7 cM, 473.6 Mb) with a LOD of 5.0 and a  $R^2$   
463 of 17.5% (Table 4). The increasing allele for *QGN.perg-5A* was contributed by B19 with an additive effect that ranged from  
464 1.8 to 2.3 grains per spike (Table 4).

465

#### 466 3.3.13. QTL for GW

467 The QTL analysis identified 21 QTL for GW on chromosomes 1A, 1B, 2A, 2B, 3A, 3D, 5A, 5B, 6A, 6B, 7A, 7B and 7D  
468 with a LOD score that ranged from 2.55 to 7.13, explaining 6.8-23.3% of the phenotypic variance (Table S7). However, two  
469 QTL on chromosomes 5A (*QGW.perg-5A*) and 6B (*QGW.perg-6B*) were considered major and stable across environments.  
470 The *QGW.perg-6B* was detected in B19XB2002 while the *QGW.perg-5A* was detected in tow environments in BP11xB2002  
471 (E3 and BLUE) and in one environment in B19xB2002 (Table 4).

472 The peak of *QGW.perg-5A* was mapped at the *Tdurum\_contig67291\_367* SNP marker (78.1 cM, 573.8 Mb) with a LOD of  
473 5.59 and a  $R^2$  of 20.2% (Table 4). Finally, the peak of *QGW.perg-6B* was mapped at the *Kukri\_rep\_c117390\_70* SNP marker  
474 (43.4 cM, 127.6 Mb) with a LOD of 7.13 and a  $R^2$  of 21.6% (Table 4). Baguette parents with an additive effect that ranged  
475 from 1.2 to 3.0 g contributed to the increasing allele for *QGW.perg-5A* (Table 4). For *QGW.perg-6B*, the increasing allele  
476 was contributed by B2002 with an additive effect that ranged from 1.6 to 1.8 g (Table 4).

477

478 3.3.14. QTL for GST

479 The QTL analysis identified 14 QTL for GST on chromosomes 1D, 2B, 2D, 3A, 3B, 4B, 5A, 5B, 5D, 6A and 7B with a LOD  
480 score that ranged from 2.54 to 4.95, explaining 9.0-20.1% of the phenotypic variance (Table S7). However, no QTL was  
481 considered major and stable across environments.

482  
483 3.4. Stable and major QTL regions for spike fertility related traits

484 A total of 8 genomic regions distributed in 7 chromosomes (R1A, R2B, R3A, R5A.1, R5A.2, R5B, R7A and R7B) were  
485 identified containing 17 of the 28 stable and major QTL detected for the different traits (Table 5). The QTL located in these  
486 regions shared a confident interval of +/- 50 Mb from the SNP marker with the highest LOD value according to their physical  
487 position, indicating a potential pleiotropic effect on the corresponding traits (Table 5). The increasing alleles for R1A, R2B,  
488 R3A and R7A were always contributed by B2002. The QTL peak of the R1A region was located between 464.3-480.6 Mb  
489 (+/- 1 LOD) and harbored *QCH.perg-1A* and *QGLPA.perg-1A*, the QTL peak of the R2B region was located between 544.8-  
490 741.9 Mb (+/- 1 LOD) and harbored *QFF.perg-2B* and *QFS.perg-2B*, the QTL peak of the R3A region was located between  
491 1.9-32.1 Mb (+/- 1 LOD) and harbored *QTS.perg-3A* and *QFS.perg-3A*, and the QTL peak of the R7A region was located  
492 between 36.9-120.2 Mb (+/- 1 LOD) and harbored *QSL.perg-7A* and *QGLPA.perg-7A* (Table 5). On the other hand, the  
493 Baguette parents contributed the increasing alleles for the R5A.2 and R7B regions. The QTL peak of the R5A.2 region was  
494 located between 470.0-637.5 Mb (+/- 1 LOD) and harbored *QFFTS.perg-5A* and *QGW.perg-5A* and, the QTL peak of the  
495 R7B region was located between 605.4-709.3 Mb (+/- 1 LOD) and harbored *QFF.perg-7B* and *QFFFS.perg-7B* (Table 5).  
496 Different parents depending on the trait contributed the increasing allele for R5A.1 (Table 5). The QTL peak of the R5A.1  
497 region was located between 389.7-540.6 Mb (+/- 1 LOD) and harbored *QSL.perg-5A* and *QCN.perg-5A* with B2002 as the  
498 increasing parent and *QGN.perg-5A* with the B19 as the increasing parent. Furthermore, the QTL peak of the R5B region was  
499 located between 562.0-671.3 Mb (+/- 1 LOD) and harbored *QFS.perg-5B* and *QGLPA.perg-5B*. In this case, the increasing  
500 allele was contributed by B2002.

501  
502 Table 5. Genomic regions harboring more than one major and stable QTL.

| Genomic Region | Chr. | Left marker (-1 LOD)      | Right marker (+1 LOD)          | Physical range (Mb) <sup>a</sup> | QTL detected in this studies <sup>b</sup>                                              | Reported QTL for spike related traits                                                                                                                               |
|----------------|------|---------------------------|--------------------------------|----------------------------------|----------------------------------------------------------------------------------------|---------------------------------------------------------------------------------------------------------------------------------------------------------------------|
| R1A            | 1A   | wsnp_Ex_c4310_7770452     | RAC875_c53185_802              | 464.3-480.6                      | <i>QCH.perg-1A</i> (3, -),<br><i>QGLPA.perg-1A</i> (3, -)                              |                                                                                                                                                                     |
| R2B            | 2B   | Tdurum_contig12879_1200   | Kukri_c529_1712                | 544.8-741.9                      | <i>QFF.perg-2B</i> (4, -),<br><i>QFS.perg-2B</i> (4, -)                                |                                                                                                                                                                     |
| R3A            | 3A   | RAC875_c77648_367         | Kukri_rep_c75764_60            | 1.9-32.1                         | <i>QTS.perg-3A</i> (3, -),<br><i>QFS.perg-3A</i> (3, -)                                |                                                                                                                                                                     |
| R5A.1          | 5A   | Excalibur_rep_c111546_167 | BS00022818_51                  | 389.7 -540.6*                    | <i>QSL.perg-5A</i> (5, -),<br><i>QCN.perg-5A</i> (3, -),<br><i>QGN.perg-5A</i> (3, +1) | CN (Fan et al. 2019; Zhai et al. 2016),<br>SL (Börner et al. 2002; Fan et al. 2019;<br>Guo et al. 2018; Li et al 2018; Zhai et<br>al. 2016), GN (Guan et al., 2018) |
| R5A.2          | 5A   | Ex_c472_2724              | Vm-A1:<br>BobWhite_c21949_150  | 470.0-637.5                      | <i>QFFTS.perg-5A</i> (4, +1 and<br>+2), <i>QGW.perg-5A</i> (3, +1<br>and +2)           | GW (Wang et al. 2017; Li et al. 2018;<br>Sukumaran et al. 2018)                                                                                                     |
| R5B            | 5B   | Tdurum_contig58669_273    | Vm-B1:<br>Excalibur_c5329_1335 | 562.0-671.3                      | <i>QFS.perg-5B</i> (3, -),<br><i>QGLPA.perg-5B</i> (3, -)                              |                                                                                                                                                                     |
| R7A            | 7A   | Tdurum_contig12263_179    | Tdurum_contig82510_556         | 36.9-120.2                       | <i>QSL.perg-7A</i> (4, -),<br><i>QGLPA.perg-7A</i> (3, -)                              |                                                                                                                                                                     |
| R7B            | 7B   | wsnp_Ku_c60707_62509051   | Kukri_c16778_604               | 605.4-709.3                      | <i>QFF.perg-7B</i> (3, +1),<br><i>QFFFS.perg-7B</i> (3, +1)                            |                                                                                                                                                                     |

503 <sup>a</sup> The corresponding physical distances (Mb) of the QTL regions were obtained by blasting the flanking SNP markers (+/- 1  
504 LOD) of the most separated QTLs in the region to the Chinese Spring RefSeq v1.0 sequence

505 <sup>b</sup> Number in parenthesis indicates the total of environments in which the QTL are considered as major. The "+1" indicates  
506 that B19 allele increases the corresponding trait, "+2" indicates that BP11 allele increases the corresponding trait and the "-"  
507 indicates that B2002 allele increases the corresponding trait.

508 \* In GN BLUE the - 1 LOD SNP (Table S8) was located in a map space without markers, the closest one is 341.3 cM apart,  
509 for this reason this environment was ruled out to determine the interval of the R5A.1.

510

#### 511 4. Discussion

512 Most of the breeding progress in wheat yield potential has been achieved by selection of yield *per se* due to the lack of  
513 reliable secondary traits and molecular information available to use in MAS (Snape and Moore 2007). The yield potential  
514 improvement was, in most cases, consequence of increased GN (Waddington et al. 1986; Perry and D'Antouno 1989;  
515 Siddique et al. 1989; Slafer and Andrade 1989, 1993; Acreche et al. 2008; Del Pozo et al. 2014; Lo Valvo et al. 2018),  
516 though some recent effects of GW are being reported (Sadras and Lawson 2011; Aisawi et al. 2015; Yao et al. 2019). In the  
517 present paper we identified one stable and major QTL for GN in the chromosome 5A (*QGN.perg-5A*) mapping in the same  
518 position than the one reported by Guan et al. (2018). However, we recently reported this position as primarily controlling the  
519 fertile floret efficiency (FFE, fertile florets per g SDW) when we identified and validated the *QFFE.perg-5A* (Pretini et al.  
520 2020b). Then, as the GN is the result of the FFE and GST (both defining FE) together with the SDW (Fischer 1984, 2011),  
521 the *QFFE.perg-5A* can be detected as a QTL associated to GN, highlighting the relevance of FFE and the QTL we validated  
522 to define GN. This result exemplifies the importance of dissecting the traits into simpler and more heritable components  
523 because it enables a better future search for the actual candidate gen. In relation to GW, we detected two QTL, one on  
524 chromosome 5A and other on chromosome 6B (Table 4). The first one has already been reported (Wang et al. 2017; Li et al.  
525 2018; Sukumaran et al. 2018), but the second one, the *QGW.perg-6B* is novel. This QTL is located 157.7 Mb apart from the  
526 B genome homeolog (*GW2-B1*) of the *GW2* gene, associated with grain size (Su et al. 2011), suggesting that it would not be  
527 a candidate gene to explain the phenotypic variations observed.

528 The GN is complex a trait itself, being the result of many numerical and physiological spike fertility related traits. In the  
529 present study, 25 major and stable QTL for spike fertility related traits were detected (without considering the one for GN  
530 and the two of GW already mentioned in the previous paragraph). There were the only two traits for which no stable and  
531 major QTL were detected (SDW and GST), which agrees with the low narrow-sense heritability observed (see Table S6) and  
532 highlights the high impact of environment on those traits (see Table 3 in Pretini et al. 2020a). For SL, three QTL were  
533 detected. The *QSL.perg-2B* is 13.4 Mb apart from a QTL previously described (Cui et al. 2012, Table S1) and the *QSL.perg-*  
534 *5A* is located in the same region as a previously detected QTL (Li et al. 2018; Börner et al. 2002; Fan et al. 2019; Guo et al.  
535 2018; Li et al. 2018; Zhai et al. 2016, Table 1). In contrast, for the *QSL.perg-7A*, no equivalent regions have been detected in  
536 previous studies. For TS, three QTL were detected. The *QTS.perg-2D* partially overlaps with a previously detected QTL  
537 (Zhou et al. 2017, Table S1). Meanwhile, the *QTS.perg-7A* is in the same region of a previously reported QTL (Cui et al.  
538 2012; Ding et al. 2011; Fan et al. 2019; Jantasuriyarat et al. 2004; Ma et al. 2018; Xu et al. 2014; Zhai et al. 2016, Table 1),  
539 and co-localizes with the recently described *WAP0-A1* gene (674.07 Mb) that modifies the total number of spikelet per spike  
540 (Kuzay et al. 2019). Finally, the *QTS.perg-3A* detected in our work has not been previously reported. For CN, two major and  
541 stable QTL were detected, the *QCN.perg-5A*, which is in the same region as a previous detected QTL (Fan et al. 2019; Zhai



542 et al. 2016), and the *QCN.perg-2A*, which is a novel one. For FF, the two QTL detected are novel. The *QFF.perg-2B* is ~539  
543 Mb apart from the QTL for FF detected by Guo et al. (2017) discarding that it is the same region, while for *QFF.perg-7B*, no  
544 equivalent regions have been reported previously. For FS, three QTL were detected. The *QFS.perg-2B* is 540 Mb apart from  
545 a QTL detected previously (Deng et al. 2017; Ma et al. 2018, Table 1), ruling out that it was the same region. For the two  
546 remaining QTL, *QFS.perg-3A* and *QFS.perg-5B*, regions shared with other works were not detected. For the rest of the traits  
547 analyzed in this study (FFTS, FFFS, R, GLPA and CH), no other previous reports are available, to the best of our knowledge  
548 (Table S1). Then, we consider that we detected novel QTL for FFTS (*QFFTS.perg-5A* and *QFFTS.perg-5B*), FFFS  
549 (*QFFFS.perg-7B*), R (*QR.perg-2A*, *QR.perg-3B* and *QR.perg-6A*), GLPA (*QGLPA.perg-1A*, *QGLPA.perg-3A*,  
550 *QGLPA.perg-5B* and *QGLPA.perg-7A*) and CH (*QCH.perg-1A* and *QCH.perg-2B*). No QTL was detected in chromosome  
551 2A for FFTS or FFFS, where the *GNI-A1* gene (Sakuma et al. 2019), known to increase the number of grains through  
552 increase of fertile florets per spikelet, has been identified.

553 As many of the spike fertility traits detected in this study had similar positions, we identified 8 genomic regions that share 17  
554 significant and stable QTL for the different traits (R1A, R2B, R3A, R5A.1, R5A.2, R5B, R7A and R7B). Only in two of  
555 these regions (R5A.1 and R5A.2) another QTL for the same trait have previously been described, being the remaining six  
556 regions identified for the first time as important hot spots for spike fertility traits (Table 5). Interestingly, the R5A.1 region,  
557 which contains significant QTL for SL, CN and GN, is close to the *QFFE.perg-5A* identified and validated for fertile floret  
558 efficiency in Pretini et al. (2020b). The allele of B2002 parent increase the SL and CN while the allele from B19 parent  
559 increase the GN via *QFFE.perg-5A*. These results agree with the performance of the parental lines described in the present  
560 study (Table 3). The region on chromosome 5A (R5A.2), which includes *QFFTS.perg-5A* and *QGW.perg-5A* coincides with  
561 the location of the vernalization response gene *Vrn-A1*. While the R5B region, which includes *QFS.perg-5B* and  
562 *QGLPA.perg-5B*, coincides with the location of the other vernalization response gene *Vrn-B1*. Li et al. (2019) had recently  
563 reported the role of *Vrn1*, together with *FUL1* and *FUL2* on spikelet and spike development, but the *vrn1* null mutant effect  
564 was associated with a high impact on days to heading. The three parental lines of the two DH populations used in the present  
565 study are consider spring wheat due to its allelic constitution, *Vrn-A1b/vrn-B1/vrn-D1* for Baguette 19 and Baguette Premium  
566 11 parents, and *vrn-A1/Vrn-B1/vrn-D1* for BioINTA 2002, and are mostly insensitive to photoperiod, all parents showed the  
567 *Ppd-D1a* allele. This agrees with the anthesis dates of the lines within each population described in Pretini et al. (2020b),  
568 which were very close, except for the summer sowing (E5) of B19xB2002 population, where the range was higher.  
569 Furthermore, to test the effect of the two functional markers for vernalization (*Vrn-A1* and *Vrn-B1*) we made an ANOVA and  
570 detected small differences between the anthesis dates for both populations. For the BP11xB2002 population there was a  
571 difference of 3 and 5 day to anthesis depending on the allelic constitution of the *Vrn-A1* and *Vrn-B1* genes, respectively. On  
572 the other hand, for B19xB2002 population, depending on the allelic constitution of both genes, there was a difference of 3  
573 day to anthesis. No epistatic interaction was observed between *Vrn-A1* and *Vrn-B1* in the BP11xB2002 population, while a  
574 difference of up to 7 days to anthesis was observed depending on the allelic constitution in the B19xB2002 population. Based  
575 on that and in the fact that most of the QTL included in the R5A.2 and R5B regions were not expressed in E5 (except for  
576 *QGLPA.perg-5B* in B19xB2202) we consider these QTL are not masking an important phenology effect. In contrast, it could  
577 be indicating that the *Vrn-A1* and *Vrn-B1* allelic variation in the population might have a pleiotropic effect on the spike traits  
578 located in those regions with little impact on phenology in the tested conditions.



579 The spike fertility related traits are correlated, positively or negatively, depending on the trait (Hay and Kirby 1991). In  
580 addition, a negative correlation is usually observed between GN and GW (Slafer and Andrade 1989, Sadras and Lawson  
581 2011, Griffiths et al. 2015). Then, we wonder about the possible pleiotropic effects of each of the 8 regions we detected over  
582 the other spike related traits, GW and final yield per spike (YLD), following the Figure 1. For this, we performed an ANOVA  
583 for each of the evaluated traits using the highest QTL peak marker as class variables in the model and the environments were  
584 included as random class variable. Four regions had a significant effect on GN (R2B, R3A, R5A.1 and R5A.2), six on GW  
585 (R1A, R2B, R5A.1, R5A.2, R7A.1, R7A.2, and R7B), but only two in YLD (R5A.1, R5A.2). For the R5A.1 region, where  
586 the *QSL.perg-5A*, *QCN.perg-5A* and *QGN.perg-5A* were located, when the region from B19 is present it results in a shorter  
587 spike (-6% SL) without reducing the TS (+2%) or FS (ns), due to a reduction in the distance between spikelets (-5% CN).  
588 The FF increases 4% due to higher FFE (+10%), despite a reduction in the SDW (-3%) which is accompanied by a 3%  
589 increment of the FFFS. The FF increment together with the higher GST (+8%) results in an increment in GN (+7%), which  
590 translate to higher yield (+3%) despite a significant reduction in GW (Figure 1). As we mentioned previously, this region  
591 includes the *QFFE.perg-5A* identified and validated for fertile floret efficiency in Pretini et al (2020b), also within the  
592 B19xB2002 population and showed similar pleiotropic effects to the R5A.1 region. The other region that resulted in final  
593 higher YLD was the R5A.2, which contained the *QGW.perg-5A* and *QFFTS.perg-5A*. When this region from B19 is present  
594 the SL is not affected, but the distance between spikelet's is increased (+3% CN), reducing the TS (-2%). The FFFS and the  
595 FFFS increase 3 and 2%, respectively and the FFE is higher (+6%). Nevertheless, the GN is not significantly improved. The  
596 YLD improvement of R5A.2 (+5%) when B19 alleles are present is consequence of the increased GW (+6%) (Figure 1). As  
597 far as we know, the pleiotropic effect of these region had not been previously reported, except for Pretini et al. (2020b) for  
598 the *QFFE.perg-5A* which is within the R5A.1. We made a similar analysis of pleiotropic effect for each QTL identified,  
599 being the *QGW.perg-6B* the only one that has a pleiotropic effect in YLD. When the B2002 alleles are present, the spikes are  
600 longer (+2% SL), but the TS and CN is not significantly modified. Nevertheless, higher FS were detected (+2%), which was  
601 counterbalanced by a reduction in the FFFS (-2%) resulting in no impact on GN. The YLD increment (+5%) was consequent  
602 of the increased GW (+10%). This is an interesting result highlighting the relevance of this QTL for the first time. The  
603 complex pleiotropic analysis we performed, where we analyzed 14 traits and 8 regions, allow as to conclude that the R5A1  
604 and R5A.2 regions together with the *QGW.perg-6B* are of high relevance to be used in MAS to improve a set of traits related  
605 with yield potential. All the QTL identified for the spike related traits are the first step to search for their candidate genes,  
606 which would allow their better manipulation in the future.

607

608 **Fig. 4** Physiological conceptual framework of analysis of measured variables showing the main and pleiotropic effects of the  
609 R5A.1 and R5A.2 regions and *QGW.perg-5A*. The symbols = indicate not significant effect. The green percentage represent  
610 R5A.1 while the blue percentage represent R5A.2 and the red percentage represents *QGW.perg-6B*. SL: spike length, TS:  
611 total spikelets per spike, CN: compactness of the spike, FF: fertile florets per spike, FS: fertile spikelets per spike, FFFS:  
612 fertile florets per fertile spikelet, SDW: spike dry weight at anthesis, FFE: fertile floret efficiency, GN: grain number per  
613 spike, GW: grain weight, GST: grain set, YLD: yield.

614

615

616 5. References

- 617 Abbate PE, Andrade FH, Lázaro L, Bariffi JH, Berardocco HG, Inza VH, Marturano F (1998) Grain yield increase in recent  
618 Argentine wheat cultivars. *Crop Sci* 38:1203-1209
- 619 Acreche MM, Briceño-Félix G, Martín Sanchez JA, Slafer GA (2008) Physiological bases of genetic gains in Mediterranean  
620 bread wheat yield in Spain. *Eur J Agron* 28:162-170
- 621 Aisawi KAB, Reynolds MP, Singh RP, Foulkes MJ (2015) The physiological basis of the genetic progress in yield potential  
622 of CIMMYT spring wheat cultivars from 1966 to 2009. *Crop Sci* 55:1749–1764
- 623 Appels R, Eversole K, Feuillet C et al (2018) Shifting the limits in wheat research and breeding using a fully annotated  
624 reference genome. *Science* 361:6403
- 625 Basile SML, Ramirez IA, Crescente JM, Conde MB, Demichelis M, Abbate PE, Rogers WJ, Pontaroli AC, Helguera M,  
626 Vanzetti LS (2019) Haplotype block analysis of an Argentinean hexaploid wheat collection and GWAS for yield  
627 components and adaptation. *BMC Plant Biol* 19:553
- 628 Bhatramakki D, Dolan M, Hanafey M, Wineland R, Vaske D, Register III JC, Tingey SV, Rafalski A (2002) Insertion-  
629 deletion polymorphisms in 3' regions of maize genes occur frequently and can be used as highly informative genetic  
630 markers. *Plant Mol Biol* 48:539–547
- 631 Borlaug NE (2007) Sixty-two years of Wghting hunger: personal recollections. *Euphytica* 157:287–297
- 632 Broman KW, Wu H, Sen S, Churchill GA (2003) R/qtl: QTL mapping in experimental crosses. *Bioinformatics* (Oxford,  
633 England) 19:889–890
- 634 Börner A, Schumann E, Fürste A, Cöster H, Leithold B, Röder M, Weber W (2002) Mapping of quantitative trait loci  
635 determining agronomic important characters in hexaploid wheat (*Triticum aestivum* L.). *Theor Appl*  
636 *Genet* 105:921–936
- 637 Bustos DV, Hasan AK, Reynolds MP, Calderini DF (2013) Combining high grain number and weight through a DH-  
638 population to improve grain yield potential of wheat in high-yielding environments. *Field Crop Res* 145:106–115
- 639 Chand R (2009) Challenges to ensuring food security through wheat. *CAB Reviews: Perspectives in Agriculture, Veterinary*  
640 *Science, Nutrition and Natural Resources* 4
- 641 Chen D, Wu XY, Wu K, Zhang JP, Liu WH, Yang XM, Li XQ, Lu YQ, Li LH (2017) Novel and favorable genomic regions  
642 for spike related traits in a wheat germplasm Pubing 3504 with high grain number per spike under varying  
643 environments. *J Integr Agric* 16(11):2386–2401
- 644 Cui F, Ding A, Li J, Zhao C, Wang L, Wang X, Qi X, Li X, Li G, Gao J, Wang H (2012). QTL detection of seven spike-  
645 related traits and their genetic correlations in wheat using two related RIL populations. *Euphytica* 186, 177–192.
- 646 Cuthbert JL, Somers DJ, Brûlé-Babel AL, Brown PD, Crow GH (2008) Molecular mapping of quantitative trait loci for yield  
647 and yield components in spring wheat (*Triticum aestivum* L.). *Theor Appl Genet* 117:595–608
- 648 Daba SD, Tyagi P, Brown-Guedira G, Mohammadi M (2018). Genome-Wide Association Studies to Identify Loci and  
649 Candidate Genes Controlling Kernel Weight and Length in a Historical United States Wheat Population. *Front Plant*  
650 *Sci* 9: 1045
- 651 Del Pozo A, Mathus I, Serret MD, Araus JL (2014) Agronomic and physiological traits associated with breeding advances of  
652 wheat under high productive Mediterranean conditions. The case of Chile. *Environ Exp Bot* 130:180-189

- 653 Deng Z, Cui Y, Han Q, Fang W, Li J, Tian J (2017) Discovery of Consistent QTLs of Wheat Spike-Related Traits under  
654 Nitrogen Treatment at Different Development Stages. *Front Plant Sci* 8:2120
- 655 Di Rienzo JA, Casanoves F, Balzarini MG, Gonzalez L, Tablada M, Robledo CW (2016) Grupo InfoStat, FCA, Universidad  
656 Nacional de Córdoba, Argentina.
- 657 Ding AM, Li J, Cui F, Zhao CH, Ma HY, Wang HG (2011) Mapping QTLs for Yield Related Traits Using Two Associated  
658 RIL Populations of Wheat. *Acta Agronomica Sinica* 37:1511-1524
- 659 Elía M, Savin R, Slafer GA (2016) Fruiting efficiency in wheat: physiological aspects and genetic variation among modern  
660 cultivars. *Field Crop Res* 191:83–90
- 661 Evans LT (1996) *Crop Evolution, Adaptation and Yield*. Cambridge University Press.
- 662 Fan X, Cui F, Ji J, Zhang W, Zhao X, Liu J, Meng D, Tong Y, Wang T, Li J (2019) Dissection of Pleiotropic QTL Regions  
663 Controlling Wheat Spike Characteristics Under Different Nitrogen Treatments Using Traditional and Conditional  
664 QTL Mapping *Front Plant Sci* 10:187
- 665 Fischer RA (1975) Yield Potential in a Dwarf Spring Wheat and the Effect of Shading I. *Crop Sci* 15:607–613.
- 666 Fischer RA (1984) Wheat. In: Smith WH, Banta, SJ (Eds.) Symposium on potential productivity of field crops under  
667 different environments. International Rice Research Institute 129-153
- 668 Fischer RA (1985) Number of kernels in wheat crops and the influence of solar radiation and temperature. *J Agr Sci*  
669 105:447–461
- 670 Fischer RA (1993) Irrigated spring wheat and timing and amount of nitrogen fertilizer. II. Physiology of grain yield response.  
671 *Field Crop Res* 33: 57-80
- 672 Fischer RA (2011) Wheat physiology: a review of recent developments. *Crop Pasture Sci* 62:95–114
- 673 Fischer RA, Edmeades GO (2010) Breeding and Cereal Yield Progress. *Crop Sci* 50:S–85–S–98
- 674 Fischer RA, Stockman YM (1980) Kernel Number per Spike in Wheat (*Triticum Aestivum* L.): Responses to Preanthesis  
675 Shading. *Aust J Plant Physiol* 7:169–180
- 676 Fischer RP, Nowicki S, Kelley M and Schmidt GA. (2014) A system of conservative regridding for ice-atmosphere coupling  
677 in a General Circulation Model (GCM). *Geosci Model Dev* 7:883-907
- 678 Fu D, Szűcs P, Yan L, Helguera M, Skinner JS, von Zitzewitz J, Hayes PM, Dubcovsky J (2005) Large deletions within the  
679 first intron in VRN-1 are associated with spring growth habit in barley and wheat. *Mol Genet Genomic* 273:54–65
- 680 Gao F, Wen W, Liu J, Rasheed A, Yin G, Xia X, Wu X, He Z (2015) Genome-wide linkage mapping of QTL for yield  
681 components, plant height and yield-related physiological traits in the Chinese wheat cross Zhou 8425B/Chinese  
682 Spring. *Front Plant Sci* 6:1099
- 683 García GA, Serrago RA, González FG, Slafer GA, Reynolds MP, Miralles DJ (2014) Wheat grain number: Identification of  
684 favourable physiological traits in an elite doubled-haploid population. *Field Crop Res* 168:126-134
- 685 Gerard GS, Alqudah A, Lohwasser U, Börner A, Simón MR (2019) Uncovering the Genetic Architecture of Fruiting  
686 Efficiency in Bread Wheat: A Viable Alternative to Increase Yield Potential. *Crop Sci* 59:1-17
- 687 González FG, Slafer GA, Miralles DJ (2003) Grain and floret number in response to photoperiod during stem elongation in  
688 fully and slightly vernalized wheats. *Field Crop Res* 81:17-27

- 689 González FG, Miralles DJ, Slafer GA (2011) Wheat floret survival as related to pre-anthesis spike growth. *J Exp Bot*  
690 62:4889–4901
- 691 Griffiths S, Wingen L, Pietragalla J, et al. (2015). Genetic dissection of grainsize and grain number trade-offs in CIMMYT  
692 wheat germplasm. *PLoS ONE* 10(3):e0118847
- 693 Guan P, Lu L, Jia L, Kabir MR, Zhang J, Lan T, Zhao Y, Xin M, Hu Z, Yao Y, Ni Z, Sun Q, Peng H (2018) Global QTL  
694 analysis identifies genomic regions on chromosomes 4A and 4B harboring stable loci for yield-related traits across  
695 different environments in wheat (*Triticum aestivum* L.). *Front Plant Sci* 9:529
- 696 Guo J, Shi W, Zhang Z, Cheng J, Sun D, Yu J, Li X, Guo P, Hao G (2018) Association of yield-related traits in founder  
697 genotypes and derivatives of common wheat (*Triticum aestivum* L.). *BMC Plant Biol* 18:38
- 698 Guo Z, Chen D, Alqudah AM, Röder MS, Ganai MW, Schnurbusch T (2017) Genome-wide association analyses of 54 traits  
699 identified multiple loci for the determination of floret fertility in wheat. *New Phytol* 214:257–270
- 700 Hallauer AR, Miranda F (1981) Quantitative genetics in maize breeding. 2nd. Ed. Ames: Iowa State University Press, 468
- 701 Hay R, Kirby E. (1991) Convergence and synchrony—a review of the coordination of development in wheat. *Australian*  
702 *Journal of Agricultural Research* 42:661–700
- 703 Jantasuriyarat C, Vales MI, Watson CJW, Riera-Lizarazu O 2004. Identification and mapping of genetic loci affecting the  
704 free-threshing habit and spike compactness in wheat (*Triticum aestivum* L.). *Theor Appl Genet* 108:261-273
- 705 Jones ES, Sullivan H, Bhatramakki D, Smith JSC (2007) A comparison of simple sequence repeat and single nucleotide  
706 polymorphism marker technologies for the genotypic analysis of maize (*Zea mays* L.). *Theor Appl Genet* 115:361–  
707 371
- 708 Kato K, Miura H, Sawada S (2000). Mapping QTLs controlling grain yield and its components on chromosome 5A of  
709 wheat. *Theor Appl Genet* 101:1114–1121
- 710 Kirby EJM (1988) Analysis of leaf, stem and ear growth in wheat from terminal spikelet stage to anthesis. *Field Crop Res*  
711 18:127–140
- 712 Kuzay S, Xu Y, Zhang J, et al. (2019). Identification of a candidate gene for a QTL for spikelet number per spike on wheat  
713 chromosome arm 7AL by high-resolution genetic mapping. *Theor Appl Genet* 132(9):2689-2705
- 714 Li C, Bai G, Carver B, Chao S, Wang Z (2015) Single nucleotide polymorphism markers linked to QTL for wheat yield  
715 traits. *Euphytica* 4:1-11
- 716 Li F, Wen W, He Z, Liu J, Jin H, Cao S, Geng H, Yan J, Zhang P, Wan Y, Xia X (2018) Genome-wide linkage mapping of  
717 yield-related traits in three Chinese bread wheat populations using high-density SNP markers. *Theor Appl Genet*  
718 131(9):1903-1924
- 719 Lo Valvo PJ, Miralles DJ, Serrago RA (2018) Genetic progress in Argentine bread wheat varieties released between 1918  
720 and 2011: Changes in physiological and numerical yield components. *Field Crop Res* 221:314-321
- 721 Liu J, Xu Z, Fan X, Zhou Q, Cao J, Wang F, Ji G, Yang L, Feng B, Wang T (2018) A Genome-Wide Association Study of  
722 Wheat Spike Related Traits in China. *Front Plant Sci* 9:1584
- 723 Liu J, Wu B, Singh RP, Velu G (2019) QTL mapping for micronutrients concentration and yield component traits in a  
724 hexaploid wheat mapping population. *J Cereal Sci* 88:57-64

- 725 Ma F, Xu Y, Ma Z, Li L, An D (2018) Genome-wide association and validation of key loci for yield-related traits in wheat  
726 founder parent Xiaoyan 6. *Mol Breed* 38:91
- 727 Ma Y, Chen G-Y, Zhang L-Q, Liu Y-X, Liu D-C, Wang J-R, Pu Z, Zhang L, Lan X-J, Wei Y-M, Liu C-J, Zheng Y-L (2014)  
728 QTL Mapping for Important Agronomic Traits in Synthetic Hexaploid Wheat Derived from *Aegilops tauschii* ssp.  
729 *tauschii*. *J Integr Agric* 13(9):1835-1844
- 730 Ma Z, Zhao D, Zhang C, Zhang Z, Xue S, Lin F, Kong Z, Tian D, Luo Q (2007) Molecular genetic analysis of five spike-  
731 related traits in wheat using RIL and immortalized F2 populations *Mol Gen Genomics* 277:31–42
- 732 Mahibbur M, Govindarajulu Z (1997) A modification of the test of Shapiro and Wilk for normality. *J Appl Stat* 24(2):219-  
733 236
- 734 Mammadov J, Aggarwal R, Buyyarapu R, Kumpatla S (2012) SNP markers and their impact on plant breeding. *Int J Plant*  
735 *Genomics*
- 736 FAO, 2017. FAOSTAT. Food and Agriculture Organization of the United Nations, Rome, Italy
- 737 Perry MW, D'Antuono MF (1989) Yield improvement and associated characteristics of some Australian spring wheat  
738 cultivars introduced between 1860 and 1982. *J Agric Res* 40:457-472
- 739 Pretini N, Terrile II, Gazaba LN, Donaire G, Arisnabarreta S, Vanzetti LS, González FG (2020) A comprehensive study of  
740 spike fruiting efficiency in wheat. *Crop Sci* 60:1541-1555
- 741 Pretini N, Vanzetti LS, Terrile II, Börner A, Plieske J, Ganal M, Röder M, González FG (2020) Identification and validation  
742 of QTL for spike fertile floret and fruiting efficiencies in hexaploid wheat (*Triticum aestivum* L.). *Theor Appl*  
743 *Genet* 133:2655–2671
- 744 Rivera-Amado C, Trujillo-Negrellos E, Molero G, Reynolds MP, Sylvester-Bradley R, Foulkes MJ (2019). Optimizing dry-  
745 matter partitioning for increased spike growth, grain number and harvest index in spring wheat. *Field Crop*  
746 *Res* 240:154-167
- 747 Sadras VO, Lawson C (2011) Genetic gain in yield and associated changes in phenotype, trait plasticity and competitive  
748 ability of south Australian wheat varieties released between 1958 and 2007. *Crop Pasture Sci* 62:533–549
- 749 Sakuma S, Golan G, Guo Z, et al. (2019) Unleashing floret fertility in wheat through the mutation of a homeobox gene. *Proc*  
750 *Natl Acad Sci USA* 116: 5182
- 751 Siddique KHM, Kirby EJM, Perry MW (1989) Ear: Stem ratio in old and modern wheat varieties; relationship with  
752 improvement in number of grains per ear and yield. *Field Crop Res* 21:59–78
- 753 Slafer GA, Andrade FH (1989) Genetic improvement in bread wheat (*Triticum aestivum*) yield in Argentina. *Field Crop Res*  
754 21:289-296
- 755 Slafer GA, Andrade FH (1993) Physiological attributes related to the generation of grain yield in bread wheat cultivars  
756 released at different eras. *Field Crop Res* 31:351-367.
- 757 Slafer GA, Andrade FH (1993) Physiological attributes related to the generation of grain yield in bread wheat cultivars  
758 released at different eras. *Field Crop Res* 31:351-367



- 759 Snape JW, Moore G (2007) Reflections and Opportunities: Gene Discovery in the Complex Wheat Genome. In: Buck HT,  
760 In: Nisi JE, In: Salomón N, eds. Wheat Production in Stressed Environments. Dordrecht: Springer Netherlands 677–  
761 684
- 762 Su, Z., Hao, C., Wang, L., Dong, Y., & Zhang, X. (2011) Identification and development of a functional marker of TaGW2  
763 associated with grain weight in bread wheat (*Triticum aestivum* L.). *Theor Appl Genet* 122(1):211-223
- 764 Sukumaran S, Lopes M, Dreisigacker S, Reynolds M (2018) Genetic analysis of multi-environmental spring wheat trials  
765 identifies genomic regions for locus-specific trade-offs for grain weight and grain number. *Theor Appl Genet*  
766 131:985–998
- 767 Tang YL, Li J, Wu YQ, Wei HT, Li CS, Yang WY, Chen F (2011) Identification of QTL for yield-related traits in the  
768 recombinant inbred line population derived from the cross between a synthetic hexaploid wheat-derived variety  
769 Chuanmai 42 and a Chinese elite variety Chuannong 16. *Agric Sci China* 10:1665–1680
- 770 Terrile II, Miralles DJ, González FG (2017) Fruiting efficiency in wheat (*Triticum aestivum* L): Trait response to different  
771 growing conditions and its relation to spike dry weight at anthesis and grain weight at harvest. *Field Crop Res*  
772 201:86–96
- 773 Waddington SR, Cartwright PM, Wall PCA (1983) Quantitative Scale of Spike Initial and Pistil Development in Barley and  
774 Wheat. *Ann Bot* 51:119–130
- 775 Waddington SR, Ranson JK, Osmanzai M, Saunders SA (1986) Improvement in the yield potential of bread wheat adapted to  
776 the northwest Mexico. *Crop Sci* 26:698-703
- 777 Wang J, Liu W, Wang H, Li L, Wu J, Yang X, Wang J, Yang X, Li X, Gao A (2011) QTL mapping of yield-related traits in  
778 the wheat germplasm 3228. *Euphytica* 177:277–292
- 779 Wang RX, Hai L, Zhang XY, You GX, Yan CS, Xiao SH (2009) QTL mapping for grain filling rate and yield-related traits  
780 in RILs of the Chinese winter wheat population Heshangmai x Yu8679. *Theor Appl Genet* 118:313–325
- 781 Wang S, Basten CJ, Zeng ZB (2012) Windows QTL Cartographer 2.5. Department of Statistics, North Carolina State  
782 University, Raleigh, NC
- 783 Wang S, Wong D, Forrest K, et al. (2014) Characterization of polyploid wheat genomic diversity using a high-density 90  
784 000 single nucleotide polymorphism array. *Plant Biotechnol J* 12:787-796
- 785 Wang SX, Zhu YL, Zhang DX, Shao H, Liu P, Hu JB, Zhang H, Zhang HP, Chang C, Lu J, Xia XC, Sun GC, Ma CX (2017)  
786 Genome-wide association study for grain yield and related traits in elite wheat varieties and advanced lines using  
787 SNP markers. *PLoS One* 12(11):e0188662
- 788 Wu XS, Chang XP, Jing RL (2012). Genetic insight into yield-associated traits of wheat grown in multiple rain-fed  
789 environments. *PLoS One* 7:e31249
- 790 Xu Y, Wang R, Tong Y, Zhao H, Xie Q, Liu D, Zhang A, Li B, Xu H, An D (2014) Mapping QTLs for yield and nitrogen-  
791 related traits in wheat: influence of nitrogen and phosphorus fertilization on QTL expression. *Theor Appl Genet*  
792 127:59–72
- 793 Yan L, Helguera M, Kato K, Fukuyama S, Sherman J, Dubcovsky J (2004) Allelic variation at the VRN-1 promoter region in  
794 polyploid wheat. *Theor Appl Genet* 109:1677–1686



795 Yao H, Xie Q, Xue S, Luo J, Lu J, Kong Z, Wang Y, Zhai W, Lu N, Wei R, Yang Y, Han Y, Zhang Y, Jia H, Ma Z (2019)  
796 HL2 on chromosome 7D of wheat (*Triticum aestivum* L.) regulates both head length and spikelet number. *Theor*  
797 *Appl Genet* 132:1789–1797

798 Zadoks JC, Chang TT, Konzak CF (1974) A decimal code for the growth stages of cereals. *Weed Res* 14:415–421

799 Zhai H, Feng Z, Li J, Liu X, Xiao S, Ni Z, Sun Q (2016) QTL analysis of spike morphological traits and plant height in  
800 winter wheat (*Triticum aestivum* L.) using a high-density SNP and SSR-based linkage map. *Front Plant Sci* 7:1617

801 Zhai H, Feng Z, Du X et al. (2017) A novel allele of TaGW2-A1 is located in a finely mapped QTL that increases grain  
802 weight but decreases grain number in wheat (*Triticum aestivum* L.). *Theor Appl Genet* 131:539–553

803 Zhou Y, Conway B, Miller D, Marshall D, Cooper A, Murphy P, Chao S, Brown Guedira G, Costa J (2017) Quantitative  
804 Trait Loci Mapping for Spike Characteristics in Hexaploid Wheat. *Plant genome* 10(2):1-15

805

806

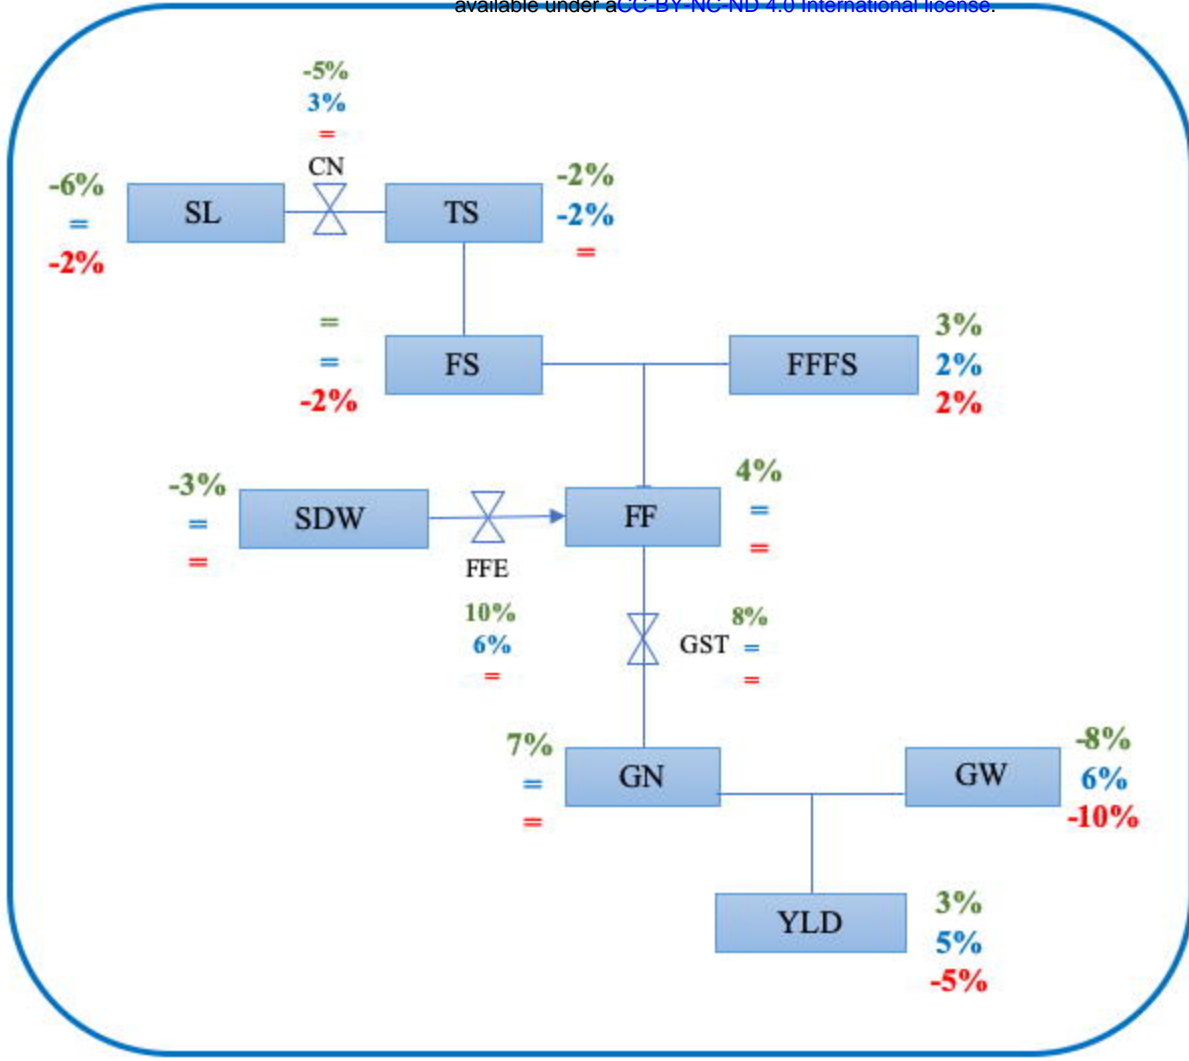

Source: https://www.biorxiv.org/content/10.1101/2020.10.08.331264v1.full.pdf
